# Supplementary material
Source: PubMed Central journal article supplement (PMC3715856)
Supplement: emboj2013127s1.pdf [file emboj2013127s1.pdf]

**Supplementary Information**

**“Wnt/ $\beta$ -catenin signaling induces MLL to create epigenetic changes in salivary gland tumors”**

Peter Wend, Liang Fang, Qionghua Zhu, Jörg H. Schipper, Christoph Loddenkemper, Frauke Kosel, Volker Brinkmann, Klaus Eckert, Simone Hindersin, Jane D. Holland, Stephan Lehr, Michael Kahn, Ulrike Ziebold, Walter Birchmeier

Our **Supplementary Information** is submitted as merged pdf-file and includes:

- Seven Supplementary Figures and Legends
- Seven Supplementary Tables
- Supplemental References

## Supplemental Figure Legends

**Figure S1.** *Co-expression of Keratin 10 and nuclear  $\beta$ -catenin in tumor cells at the invasive front of human salivary gland tumors. Anatomy and K14-Cre activity in mouse salivary glands. Scheme of breeding and verification of gene recombination. (A)* Sections of representative human salivary gland tumors (Tu1, Tu2) stained by immunofluorescence for cytokeratin 10 (in red) and  $\beta$ -catenin (in green, DAPI in blue). White dashed lines indicate tumor fronts. White arrow highlight cells co-expressing CK10 and nuclear  $\beta$ -catenin; white stars highlight CK10<sup>negative</sup>/nuclear  $\beta$ -catenin cells. st; stroma, tu; tumor. **(B)** Structure of the salivary gland (AC; acinar cells, MEC; myoepithelial cells, IDC; intercalated duct cells, DC; ductal cells). **(C)** Keratin14-Cre-mediated expression of LacZ can be detected in ductal but not in acinar cells of the mouse salivary gland at P1. **(D,E)** Verification of K14 expression in salivary gland ducts by *in situ* hybridization. **(F)** Breeding scheme for the generation of compound mutant mice. **(G)** K14-Cre-mediated recombination of the BmpR1a and  $\beta$ -catenin genes was evaluated by recombination-specific PCR in wildtype, single mutant and double mutant (tumor) cells. Bars in A; 50  $\mu$ m. Bars in C,D 200  $\mu$ m.

**Figure S2.** *Wnt/ $\beta$ -catenin and Bmp signaling in the regulation of proliferation, apoptosis, and differentiation in mouse salivary glands at P90. Phenotypes in other K14-expressing tissues, and cytokeratin 10 expression in transplanted tumors. (A)* Histological analysis of wildtype, single (K14Cre;Bmpr1a<sup>LOF</sup> or K14Cre; $\beta$ -cat<sup>GOF</sup>) and tumorigenic double mutant (K14Cre; $\beta$ -cat<sup>GOF</sup>;Bmpr1a<sup>LOF</sup>) salivary glands as revealed by H&E staining and immunohistochemistry for cytokeratin 10 (marker for squamous cell carcinoma; insets) (Chu and Weiss, 2002). Bars; 250  $\mu$ m. **(B)** Serial sections of double mutant mouse SG-SCC, as analyzed by immunohistochemistry for  $\beta$ -catenin (i) and pSmad1/5/8 (iii) and *in situ* hybridization for the Wnt/ $\beta$ -catenin target gene Axin2 (ii). Bars; 100  $\mu$ m. At tumor fronts,  $\beta$ -catenin is located in nuclei and at cell junctions in central differentiated tumor areas (inset);

whereas phospho-Smad1/5/8 staining is low (inset shows nuclear pSmad1/5/8 staining in tubular cells from a differentiated, central area of the same tumor). **(C)** Left: quantification of apoptosis in salivary glands of wildtype and mutant mice, as determined by immunofluorescence for cleaved caspase 3. Middle and right: quantitative real-time PCR for the expression of genes important for proliferation (*c-myc* and *CK6*), apoptosis (*Fas*), and differentiation (*Loricrin*). Means and the standard deviations are shown (n=3, \*p < 0.05, Student's t-test). P values are as compared with wildtype cells. **(D)** Sections of skin, esophagus and forestomach of wildtype and double mutant mice at P90, as analyzed by H&E staining. Bars; 250  $\mu$ m.

**Figure S3.** *Characterization of expression patterns of CD24, CD29 and CD44 in salivary gland cells.* **(A,B)** FACS of wt and mutant salivary gland cells for the expression of CD24 (A) and CD29 (B), as indicated by the open histograms and the corresponding isotype controls (filled histograms). **(C)** Overlay of CD24 and CD29 signal intensities of wt and mutant salivary gland cells, as analyzed by FACS (single staining are shown in A,B). **(D,E)** FACS of CD44 expression in double mutant CD24<sup>+</sup>CD29<sup>+</sup> tumor propagating cells. Note that CD24<sup>+</sup>CD29<sup>+</sup> cells weakly express CD44. CT26 cells (a mouse colon carcinoma cell line) served as positive control for high CD44 expression.

**Figure S4.** *Proliferative activity in different subpopulations of double mutant salivary gland tumor cells, growth kinetics and cytokeratin expressions in transplanted tumors, and tumor propagating cells in secondary and tertiary tumor transplants.* **(A)** Freshly isolated tumor cells from double mutant mice were analyzed by FACS for the expression of CD24 and CD29 (profiles shown in black) and the proliferation marker Ki67 (profile indicated in red). **(B)** Quantification of proliferation in different CD24/CD29 subpopulations of double mutant tumor cells (of samples shown in A). Note that proliferation is highest in the high

CD24<sup>+</sup>CD29<sup>+</sup> expressing tumor propagating cell population (P1) and in CD24<sup>low</sup>CD29<sup>+</sup> cells (P4). **(C)** Tumor growth kinetics of transplants generated from different numbers of unsorted or sorted CD24<sup>+</sup>CD29<sup>+</sup> salivary gland tumor cells after subcutaneous injection in the back skin of NOD/SCID mice (n=3). **(D)** Sections of tumors generated by injection of CD24<sup>+</sup>CD29<sup>+</sup> tumor propagating cells of the salivary gland of double mutant mice into back skin of NOD/SCID mice. Cytokeratin 10 was highly expressed in differentiated but not in dedifferentiated parts of the tumors, as revealed by immunofluorescence analysis (CK10 in red, DAPI nuclei staining in blue). **(E)** Sections of tumors generated by injection of CD24<sup>+</sup>CD29<sup>+</sup> tumor propagating cells of the salivary gland of double mutant mice into back skin of NOD/SCID mice. CK10 and CK14 are co-expressed by the tumor cells as revealed by immunofluorescence analysis (CK10 in red, CK14 in green, DAPI nuclear staining in blue). **(F)** FACS of salivary gland tumor cells from double mutant mice from secondary (2<sup>nd</sup>) and tertiary (3<sup>rd</sup>) transplanted tumors. High CD24<sup>+</sup>CD29<sup>+</sup> expressing cells are marked by squares (insets), and quantification is shown above the squares (details on isotype control staining are shown in Supplementary Fig. 3). **(G)** Tumor outgrowths produced from subcutaneous injections of different cell numbers of unsorted or sorted CD24<sup>+</sup>CD29<sup>+</sup> cells from secondary and tertiary tumors from double mutant glands into the back skin of NOD/SCID mice (each group n=3). Bar in D,E; 100 μm.

**Figure S5.** *Salivary gland CD24<sup>+</sup>CD29<sup>+</sup> tumor propagating cells show increased expression of genes associated with maintenance of pluripotency and exhibit an increase in permissive and a decrease in repressive chromatin marks.* **(A)** Determination of active Bmp signaling by immunofluorescence for phospho-Smad 1/5/8 (in red; DAPI in blue) of cytopins of unsorted and CD24<sup>+</sup>CD29<sup>+</sup> double-mutant mouse salivary gland squamous cell carcinoma cells (SG-SCC). Images from the analysis of two representative SG-SCC are shown. Quantifications are shown in **(B)**. Means and the standard deviations are shown and the P value is depicted (n=3,

Student's t-test). **(C)** qRT-PCR of sorted CD24<sup>+</sup>CD29<sup>+</sup> salivary gland cells from single mutant and double mutant mice at P80 to validate the salivary gland tumor propagating cell gene signature shown in Fig. 3C, which was identified by Affymetrix microarray analysis (n=3, \*p < 0.05, ANOVA, P values are as indicated by brackets, details shown in Supplementary Fig. 5D and Table S4). **(D)** Gene signature enriched in salivary gland tumor propagating cells of double mutant mice as determined by microarray profiling. Detailed expression is shown in Tables S2 and S4. **(E)** Immunofluorescence analysis for H3K9me3 of CD24<sup>+</sup>CD29<sup>+</sup> salivary gland cells (red, DAPI in blue) from wt, single mutant (*Bmpr1a*<sup>LOF</sup> or *β-cat*<sup>GOF</sup>) and double mutant mice. **(F)** Western blot analyses of tri-methylated H3K4, H3K27 and H3K9 from wt, single and double mutant mice (dm1, dm2) and from transplanted tumors (T1, T2). Histone 3 (H3) served as loading control. **(G)** Section of human salivary gland squamous cell carcinoma (SG-SCC) stained by immunofluorescence for H3K4me3 (in red) and β-catenin (in green, DAPI in blue). H3K4me3 co-localizes with nuclear β-catenin at the tumor fronts (white dotted line). Bars in A,D,F; 50 μm.

**Figure S6.** *The impact of high Wnt/β-catenin and low Bmp signaling on the expression of stem cell markers and self-renewal in human head and neck cancer. Salispheres of mouse tumor propagating cells respond to Wnt/β-catenin, HDAC and DNA methylation inhibitors.*

**(A)** Human head and neck SCC cells (HNSCCUM-03T and HNSCCUM-02T) were analyzed by Western blotting for the expression of Axin2, pSmad1/5/8 and CD44. α-Tubulin served as a loading control. **(B)** Confirmation of the salivary gland tumor propagating cell-gene signature in human head and neck cancer cells, and effects on gene expression following treatment with either the Wnt/β-catenin activator CHIR or with the inhibitor ICG-001, as determined by qRT PCR. **(C)** Quantification of CD24<sup>+</sup>CD44<sup>+</sup> cell populations in 03T and 02T cells treated with ICG-001 or CHIR, as determined by FACS. **(D)** Quantification of sphere formation of 03T and 02T cells treated with ICG-001 or CHIR. **(E)** H&E staining of a

differentiated salisphere; inset shows magnified duct-like structures. **(F)** Differentiated salispheres show lumen formation in electron microscopy. The magnification highlights secretory granules (asterisk) and tight junctions (arrow). **(G)** Induction of *Amylase I* (*Amy1*) expression in differentiated salispheres, as detected by qRT PCR (n=3). **(H)** Phase-contrast images of salispheres in Matrigel cultures treated with valproic acid (VPA) and 5-azacytidine (Aza). In B,C,D and G, the means and the standard deviations are shown (n=3, \*p < 0.05, Student's t-test). P values are as compared with controls. Bars in E,H; 100  $\mu$ m, in F; 5  $\mu$ m.

**Figure S7.** High *Wnt*/ $\beta$ -catenin signals correlate with increased expression of *HELLS*, *NR5A2* and *MLL* in both salivary gland tumor propagating cells of double-mutant mice and high grade human head and neck tumors. **(A)** Western blot analyses of *HELLS* and *NR5A2* from salivary gland tumor propagating cells from double mutant mice after treatment with ICG-001. Tubulin served as loading control. **(B)** Human head and neck SCC cells (03T and 02T) were analyzed by immunofluorescence for nuclear  $\beta$ -catenin (in green, DAPI in blue) and changes in  $\beta$ -catenin localization were determined upon treatment with the *Wnt*/ $\beta$ -catenin inhibitor ICG-001 at 25 $\mu$ M. **(C)** Quantification of H3K4me3-positive tumor propagating cells upon siRNA-induced knockdown of *Mll*,  $\beta$ -catenin, *CBP* and *Ash1* or treatment with the *Wnt*/ $\beta$ -catenin inhibitor ICG-001 at 25 $\mu$ M, as analyzed by immunofluorescence in Figure 6C. The means and the standard deviations (SD) are specified (n=3). **(D)** siRNA efficacy in double mutant ( $\beta$ -cat<sup>GOF</sup>; *Bmpr1a*<sup>LOF</sup>) salivary gland tumor propagating cells. The effect of transiently transfected siRNA pools was analyzed by qPCR. Results are normalized for  $\beta$ -actin. **(E)** Immunofluorescence analysis for CD24 (in green) and *MLL* (in red, DAPI in blue) in salivary glands from wt, single mutant (*Bmpr1a*<sup>LOF</sup> or  $\beta$ -cat<sup>GOF</sup>) and double mutant mice. High power insets and separate channels are shown. **(F,G)** Associations between nuclear  $\beta$ -catenin, nuclear *MLL* and the clinical parameter “tumor grade” were measured on an ordinal scale and evaluated using Kendall's Tau (for  $\tau$  and p-values see Figure 6F,G, further details

are shown in Supplementary Table 1 and Materials and Methods).  $\beta$ -catenin and MLL expressions were determined by immunofluorescence analysis of human SG-SCC (n=13). **(H)** Quantification of NR5A2 expression in human head and neck cancer revealed increased levels in high grade tumors, as determined by immunohistochemistry (n=29, and data not shown). The bars give the means and standard deviations (\*\*\*p <0.001, \*p < 0.05, Student's t-test). P values are as compared with siCtr-transfected cells (D) or grade 2 tumors (H). Bars in B, E; 25  $\mu$ m.

### **Supplemental Reference**

Chu, P. G., and Weiss, L. M. (2002). Keratin expression in human tissues and neoplasms. *Histopathology* 40, 403-439.

# Wend et al., Suppl. Fig. 1

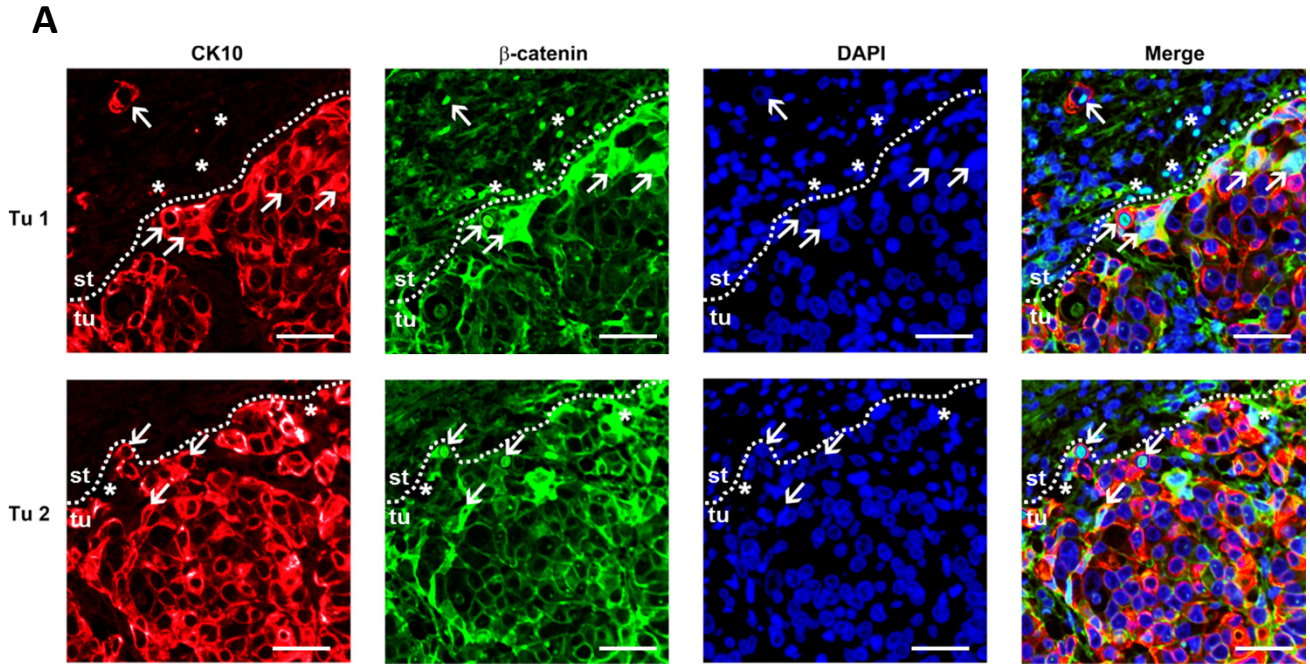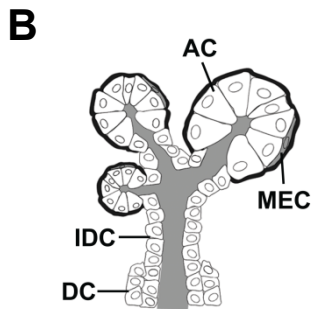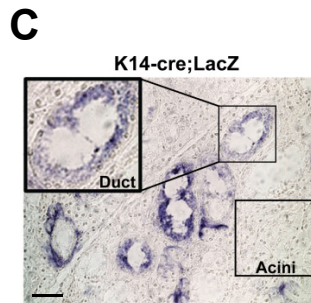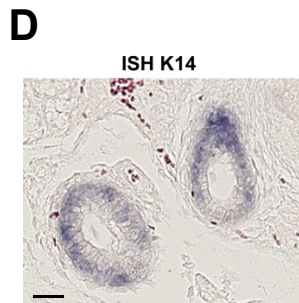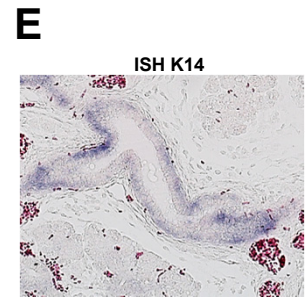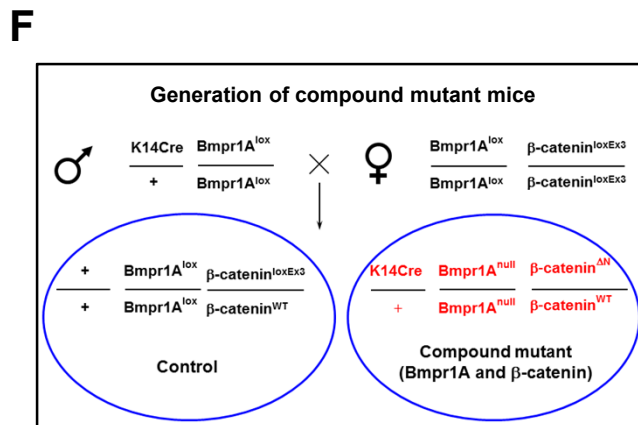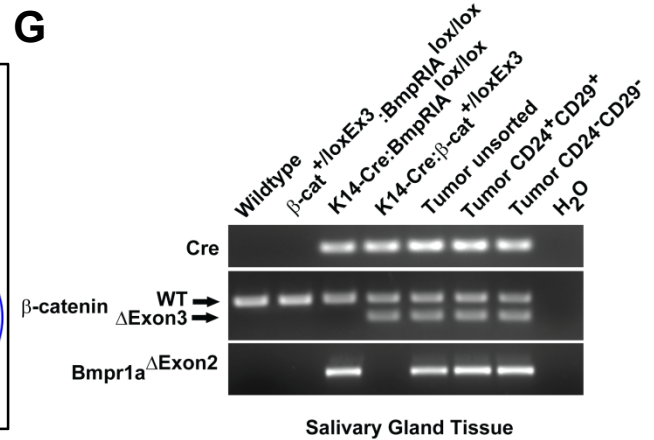



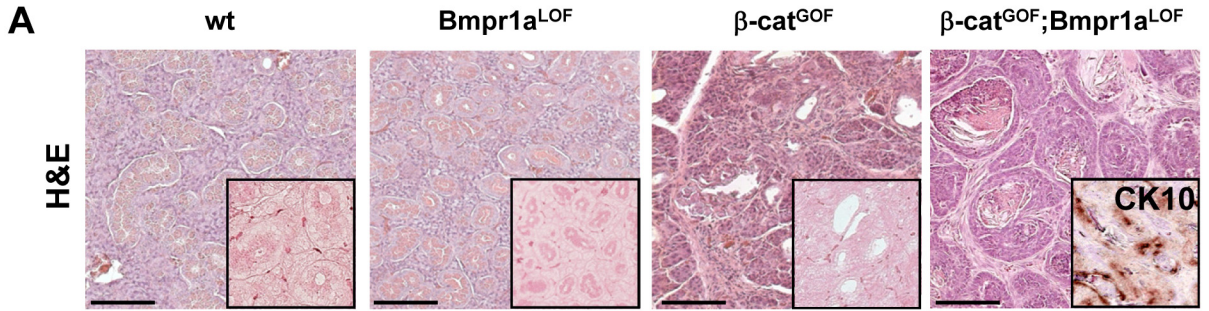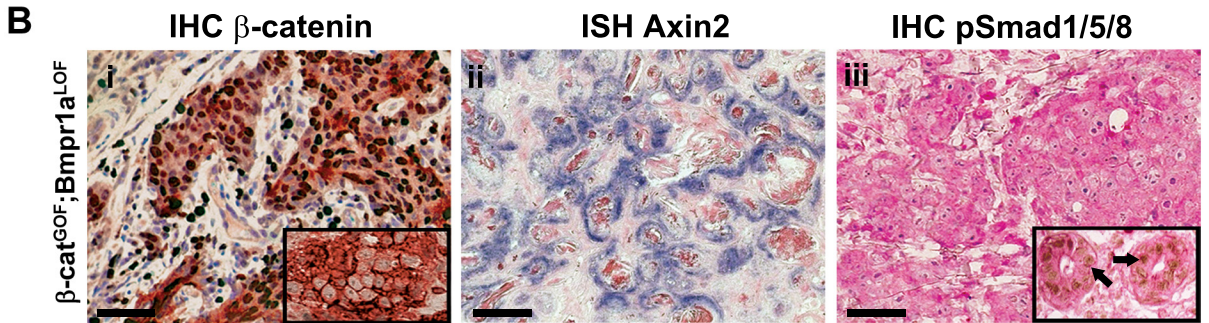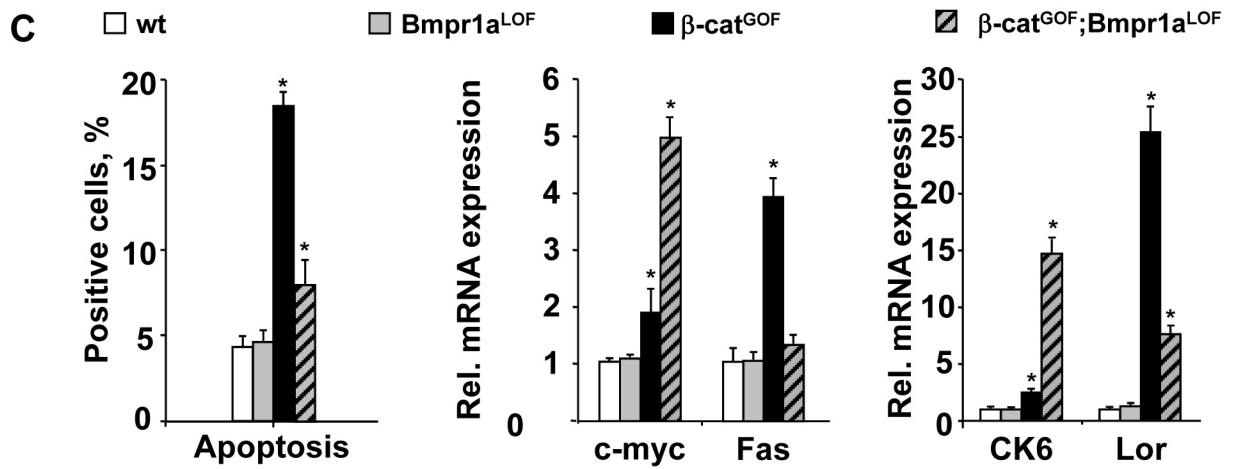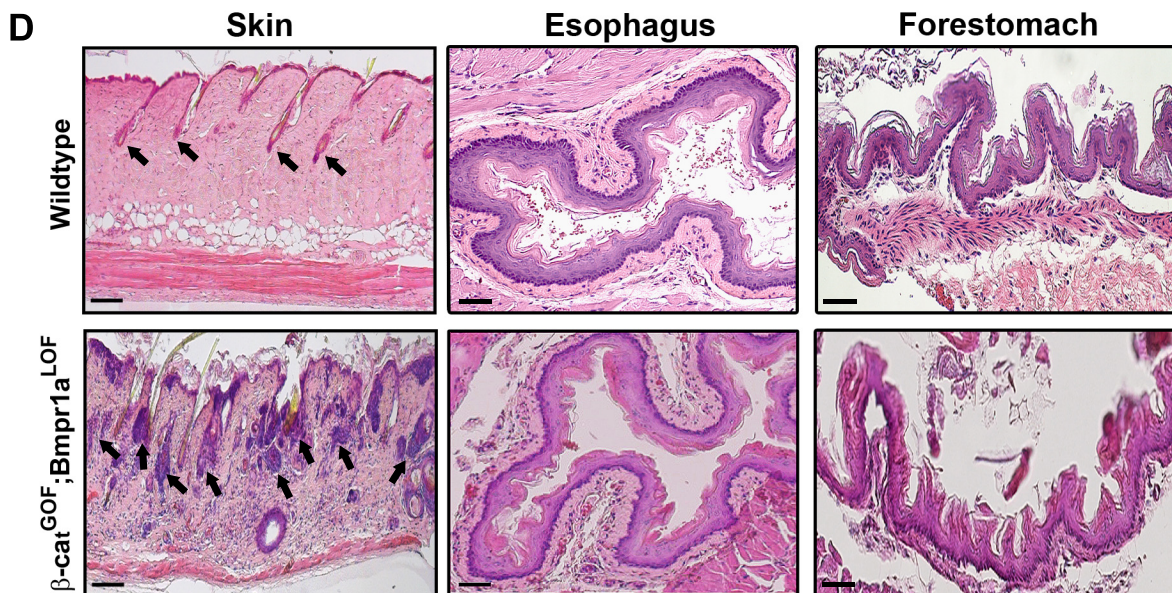

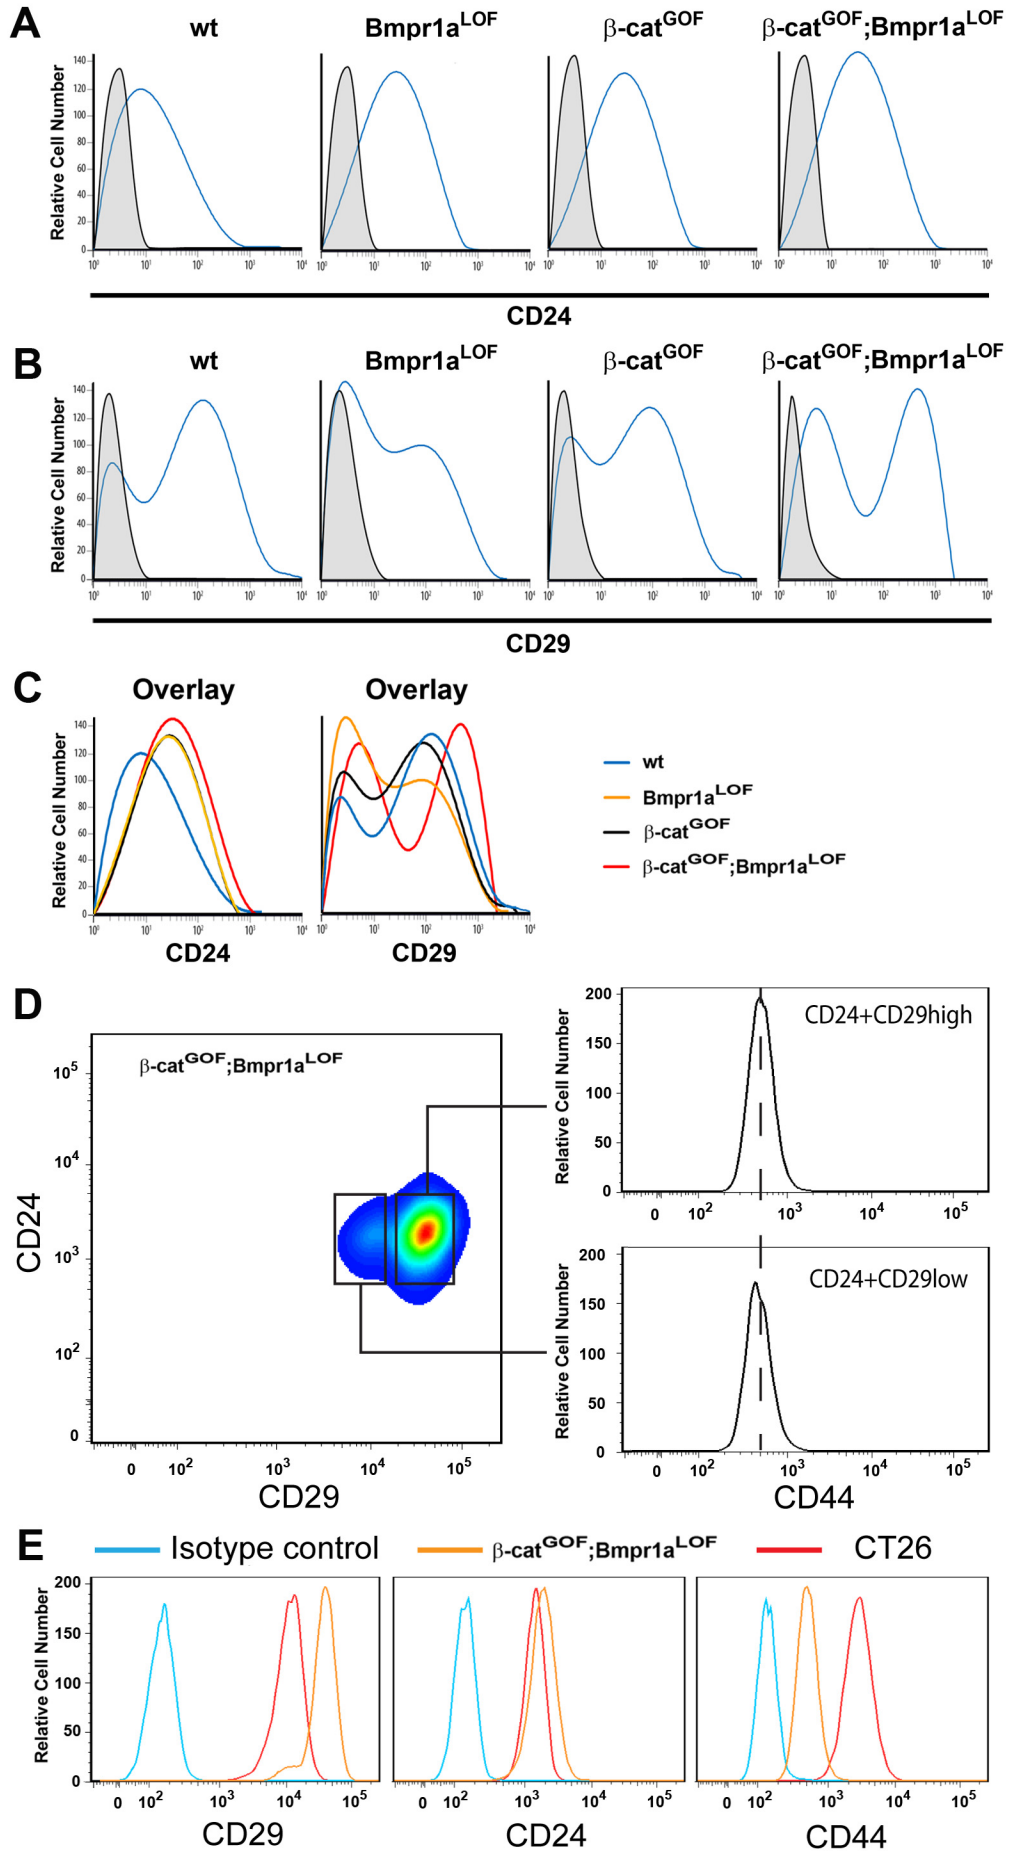

Wend *et al.*, Suppl. Fig. 4

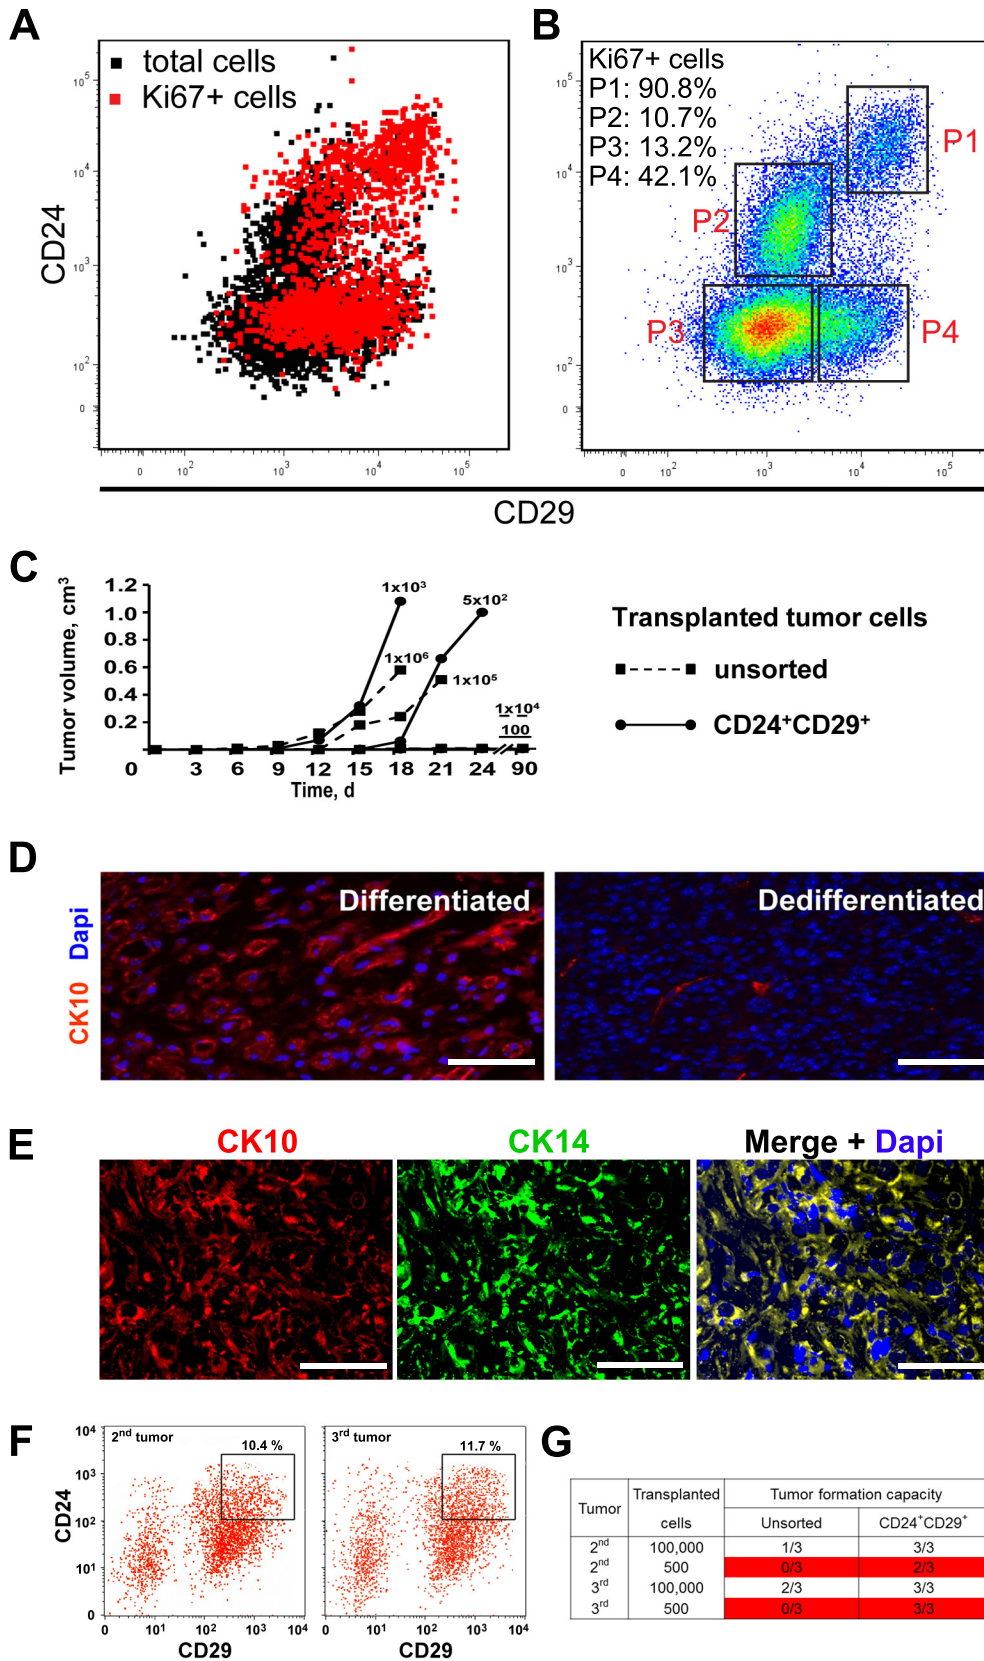

Wend et al., Suppl. Fig. 5

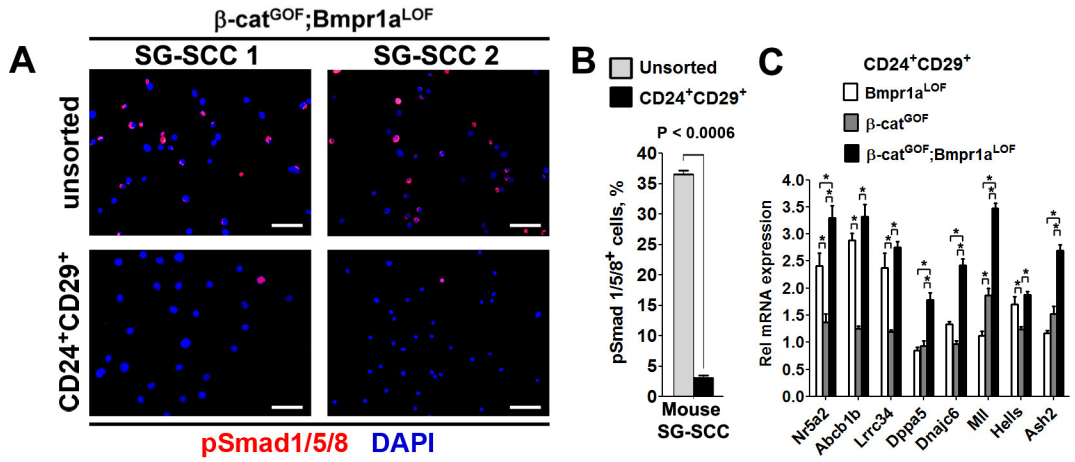

**D** Affymetrix gene profiling of CD24<sup>+</sup>CD29<sup>+</sup> salivary gland cells at P80.  
Gene signature of CD24<sup>+</sup>CD29<sup>+</sup> tumor propagating cells of the salivary gland.  
[1] = Bmpr1a<sup>LOF</sup>  
[2] =  $\beta$ -cat<sup>GOF</sup>  
[3] = double mutant

| Symbol | fc [3] / [1] | p [3] / [1] | fc [3] / [2] | p [3] / [2] |
|--------|--------------|-------------|--------------|-------------|
| Axin2  | 1,930        | 3,41E-04    | 1,898        | 8,07E-05    |
| Dnajc6 | 1,816        | 5,75E-04    | 2,491        | 2,97E-06    |
| Nr5a2  | 1,373        | 7,95E-05    | 2,409        | 3,09E-05    |
| Lrrc34 | 1,159        | 4,60E-04    | 2,309        | 1,19E-04    |
| Hells  | 1,103        | 1,41E-05    | 1,515        | 6,14E-05    |
| Abcb1b | 1,075        | 5,07E-04    | 2,655        | 2,63E-05    |

Affymetrix gene profiling of salivary glands at P1.  
[1] =  $\beta$ -cat<sup>GOF</sup>  
[2] = double mutant

| Symbol | fc [2]/[1] | p        |
|--------|------------|----------|
| Dppa5a | 2,139      | 1,99E-04 |
| Rnf2   | 1,626      | 2,80E-05 |
| Ash2   | 1,626      | 1,07E-05 |

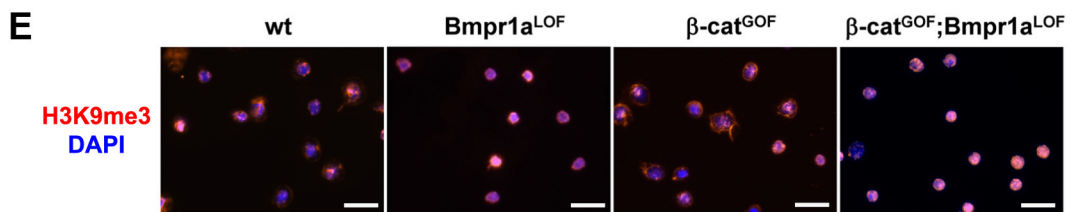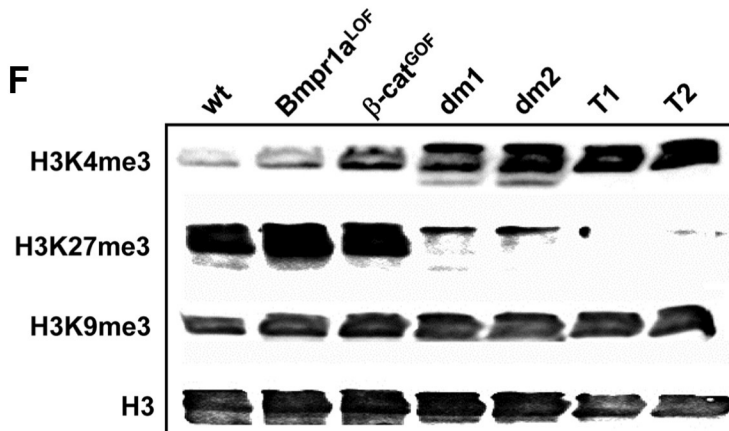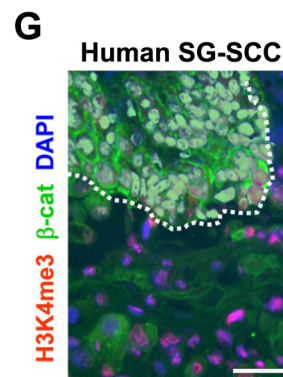

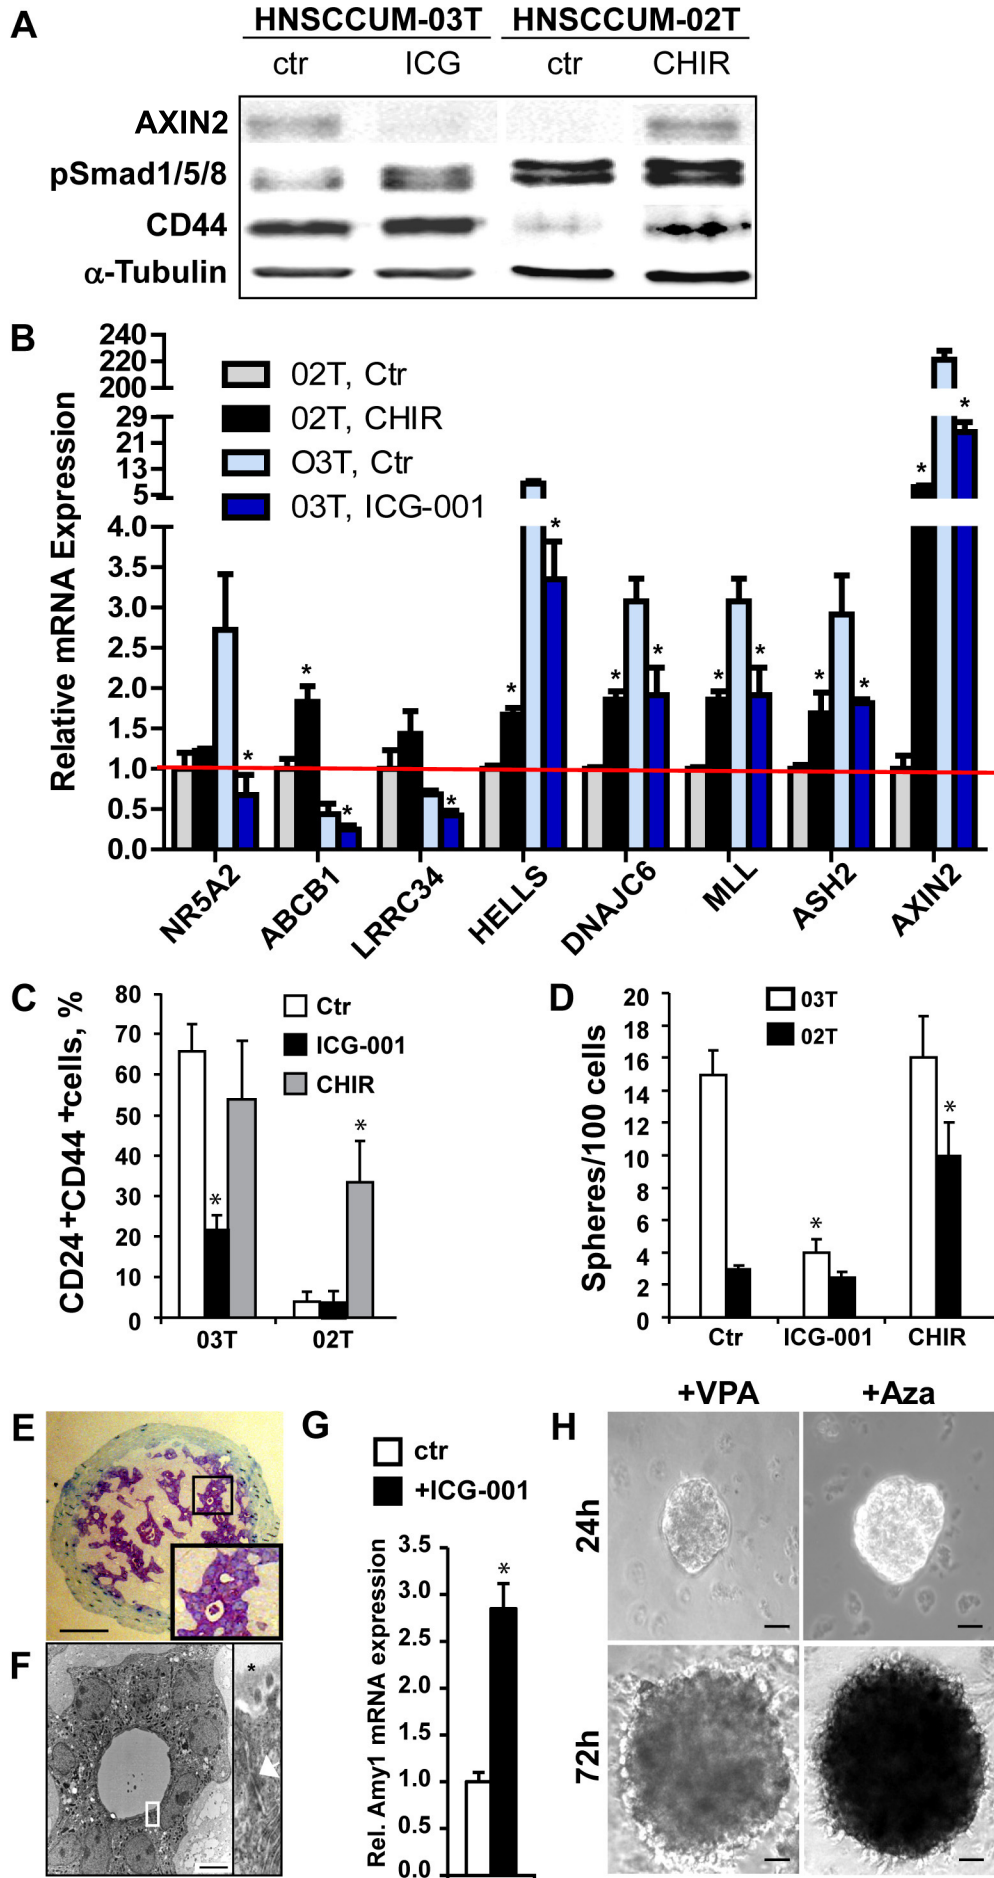

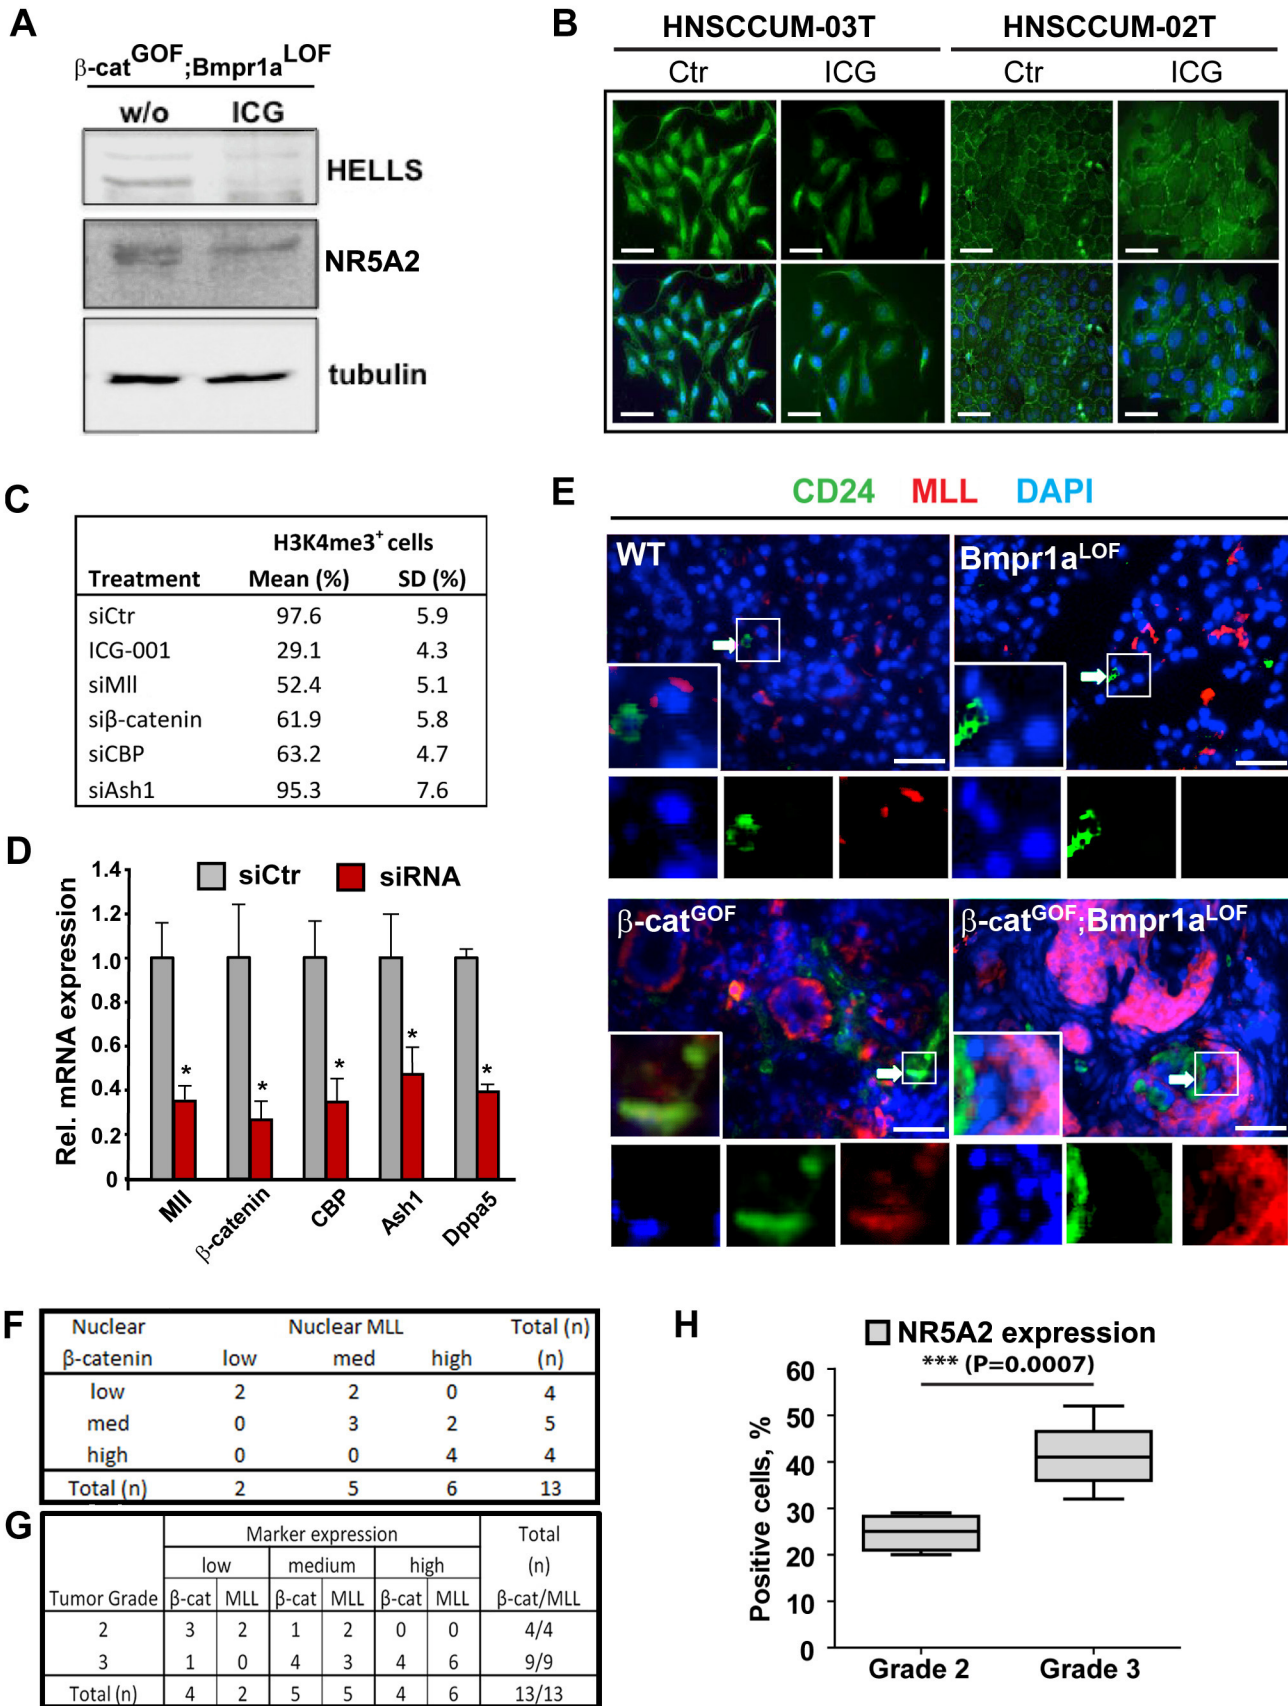

Table S1: Characteristics of human salivary gland and head and neck SCCs.<sup>1</sup>

| #  | Origin                 | SG-SCC <sup>2</sup><br># | Sex | Age at diagnosis<br>(years) | Site               | Grade | IHC<br>β-catenin <sup>3</sup> | IHC<br>pS1/5/8 <sup>3</sup> | IHC<br>MLL <sup>3</sup> |
|----|------------------------|--------------------------|-----|-----------------------------|--------------------|-------|-------------------------------|-----------------------------|-------------------------|
| 1  | Ch Berlin <sup>4</sup> | 1                        | M   | 32                          | parotid            | 3     | n (n-high)                    | -                           | high                    |
| 2  | Ch Berlin              | 2                        | M   | 55                          | parotid            | 2     | n (n-med)                     | -                           | med                     |
| 3  | Ch Berlin              | 3                        | F   | 64                          | parotid            | 3     | n (n-med)                     | -                           | med                     |
| 4  | Ch Berlin              | 4                        | F   | 71                          | parotid            | 3     | n (n-high)                    | -                           | high                    |
| 5  | Ch Berlin              | 5                        | F   | 74                          | parotid            | 3     | n (n-med)                     | -                           | high                    |
| 6  | Ch Berlin              | 6                        | M   | 76                          | parotid            | 3     | n (n-med)                     | -                           | high                    |
| 7  | Ch Berlin              | 7                        | F   | 76                          | parotid            | 2     | m (n-low)                     | +                           | med                     |
| 8  | Ch Berlin              | 8                        | F   | 76                          | parotid            | 3     | n (n-med)                     | -                           | med                     |
| 9  | Ch Berlin              | 9                        | M   | 76                          | parotid            | 3     | n (n-high)                    | -                           | high                    |
| 10 | Ch Berlin              | 10                       | F   | 79                          | sublingual         | 3     | m (n-low)                     | +                           | med                     |
| 11 | Ch Berlin              | 11                       | M   | 80                          | parotid            | 3     | n (n-high)                    | -                           | high                    |
| 12 | Ch Berlin              | 12                       | F   | 83                          | parotid            | 2     | m (n-low)                     | +                           | low                     |
| 13 | Ch Berlin              | 13                       | F   | 94                          | parotid            | 2     | m (n-low)                     | +                           | low                     |
| 14 | UH Düss <sup>5</sup>   | 14                       | M   | 61                          | parotid            | 2     | n                             | -                           | n.d.                    |
| 15 | UH Düss                | 15                       | F   | 74                          | parotid            | 2     | m                             | +                           | n.d.                    |
| 16 | UH Düss                | 16                       | M   | 76                          | parotid            | 2     | m                             | +                           | n.d.                    |
| 17 | UH Düss                | 17                       | M   | 84                          | parotid            | 2     | m                             | +                           | n.d.                    |
| 18 | UH Düss                | 18                       | F   | 90                          | parotid            | 3     | m                             | +                           | n.d.                    |
|    |                        |                          |     | Ø 73.4 ØF 78.1 ØM 67.5      |                    |       |                               |                             |                         |
|    |                        | HN-SCC <sup>6</sup><br># |     |                             |                    |       |                               |                             |                         |
| 19 | UH Düss                | 1                        | M   | 47                          | mandible           | 2     | n                             | -                           | n.d.                    |
| 20 | UH Düss                | 2                        | M   | 49                          | pharynx            | 2     | m                             | +                           | n.d.                    |
| 21 | UH Düss                | 3                        | F   | 49                          | tongue             | 2     | n                             | -                           | n.d.                    |
| 22 | UH Düss                | 4                        | M   | 51                          | tongue             | 3     | n                             | -                           | n.d.                    |
| 23 | UH Düss                | 5                        | F   | 52                          | larynx             | 3     | m                             | +                           | n.d.                    |
| 24 | UH Düss                | 6                        | M   | 54                          | mouth floor        | 3     | n                             | -                           | n.d.                    |
| 25 | UH Düss                | 7                        | M   | 57                          | glottis            | 2     | n                             | -                           | n.d.                    |
| 26 | UH Düss                | 8                        | M   | 58                          | pharynx            | 1     | m                             | +                           | n.d.                    |
| 27 | UH Düss                | 9                        | M   | 58                          | pharynx            | 2     | m                             | +                           | n.d.                    |
| 28 | UH Düss                | 10                       | M   | 58                          | tonsil             | 2     | m                             | +                           | n.d.                    |
| 29 | UH Düss                | 11                       | M   | 59                          | larynx             | 2     | m                             | +                           | n.d.                    |
| 30 | UH Düss                | 12                       | M   | 59                          | larynx             | 2     | n                             | -                           | n.d.                    |
| 31 | UH Düss                | 13                       | M   | 60                          | pharynx            | 2     | n                             | -                           | n.d.                    |
| 32 | UH Düss                | 14                       | F   | 60                          | pharynx            | 2     | m                             | +                           | n.d.                    |
| 33 | UH Düss                | 15                       | M   | 61                          | pharynx            | 2     | n                             | -                           | n.d.                    |
| 34 | UH Düss                | 16                       | M   | 61                          | tongue             | 2     | m                             | +                           | n.d.                    |
| 35 | UH Düss                | 17                       | M   | 65                          | larynx             | 1     | m                             | -                           | n.d.                    |
| 36 | UH Düss                | 18                       | M   | 65                          | mouth floor        | 2     | m                             | +                           | n.d.                    |
| 37 | UH Düss                | 19                       | M   | 66                          | larynx             | 2     | m                             | +                           | n.d.                    |
| 38 | UH Düss                | 20                       | M   | 68                          | pharynx            | 2     | n                             | -                           | n.d.                    |
| 39 | UH Düss                | 21                       | M   | 68                          | mouth floor/tongue | 2     | n                             | -                           | n.d.                    |
| 40 | UH Düss                | 22                       | M   | 71                          | pharynx            | 2     | m                             | +                           | n.d.                    |
| 41 | UH Düss                | 23                       | M   | 73                          | tonsil             | 2     | m                             | +                           | n.d.                    |
| 42 | UH Düss                | 24                       | M   | 73                          | larynx             | 2     | m                             | +                           | n.d.                    |
| 43 | UH Düss                | 25                       | M   | 73                          | tongue             | 2     | m                             | +                           | n.d.                    |
| 44 | UH Düss                | 26                       | M   | 74                          | glottis/larynx     | 2     | n                             | -                           | n.d.                    |
| 45 | UH Düss                | 27                       | M   | 77                          | pharynx            | 2     | m                             | +                           | n.d.                    |
| 46 | UH Düss                | 28                       | M   | 78                          | pharynx            | 2     | m                             | +                           | n.d.                    |
| 47 | UH Düss                | 29                       | M   | 80                          | glottis            | 2     | m                             | -                           | n.d.                    |
|    |                        |                          |     | Ø 62.9 ØF 53.7 ØM 64.0      |                    |       |                               |                             |                         |

<sup>1</sup>Tumor specimens from 47 patients with primary salivary gland and head and neck squamous cell carcinoma (SCC) were evaluated. Cases with possible metastatic origin were stringently excluded. Tumour staging and grading was performed according to current clinical and pathological classifications (Barnes et al, 2005).

**Wend *et al.*, Suppl. Table 1, pg. 2/2**

<sup>2</sup>SG-SCC, salivary gland squamous cell carcinoma. Tumors with mucoepidermoid or adenoid origin were stringently excluded by our collaborating pathologists.

<sup>3</sup>Scoring was based on intensity and percentage of positively stained cells by immunohistochemistry (IHC) for  $\beta$ -catenin (intracellular localization as analyzed for Fig. 1A: n, nuclear in  $\geq 20\%$  of the cells; m, membrane; cp, cytoplasmic. Nuclear score "n" [in brackets] as analyzed for Fig. 6F,G: low;  $\leq 5\%$ , medium; 5-25%, high;  $\geq 25\%$ ), p-Smad 1/5/8 (as analyzed for Fig. 1A: -/detectable in  $\leq 10\%$  of the cells; +/detectable in  $\geq 10\%$  of the cells), and MLL (Nuclear score as analyzed for Fig. 6F,G: low;  $\leq 5\%$ , medium; 5-20%, high;  $\geq 20\%$ ). n.d.; not determined.

<sup>4</sup>Institute of Pathology, Charité University Medicine/UKBF, 12200 Berlin, Germany

<sup>5</sup>Department of Otorhinolaryngology, University Hospital Düsseldorf, 40225 Düsseldorf, Germany

<sup>6</sup>HN-SCC, head and neck squamous cell carcinoma.

Reference:

Barnes L, Eveson JW, Reichart P, Sidransky D (2005) World Health Organization Classification of Tumours, Pathology & Genetics of Head and Neck Tumours. *IARC Press, Lyon*



**Suppl. Table 2: Affymetrix gene profiling of salivary glands at P1.\*****[1] =  $\beta$ -cat<sup>GOF</sup>****[2] =double mutant**

| Probe ID     | Symbol/Description                                      | fc [2]/[1] | p        |
|--------------|---------------------------------------------------------|------------|----------|
| 1420347_at   | palate, lung, and nasal epithelium carcinoma associated | 66.667     | 8.22E-06 |
| 1447360_at   | TSC22-related inducible leucine zipper 1b (Tilz1b)      | 35.211     | 6.87E-05 |
| 1425447_at   | dickkopf homolog 4 (Xenopus laevis)                     | 16.807     | 3.02E-06 |
| 1441172_at   | AF4/FMR2 family, member 3 (Aff3), mRNA                  | 12.594     | 5.09E-04 |
| 1437894_at   | prospero-related homeobox 1                             | 6.024      | 2.93E-04 |
| 1429856_at   | tetraspanin 18                                          | 5.464      | 3.94E-04 |
| 1450781_at   | high mobility group AT-hook 2                           | 5.291      | 2.06E-04 |
| 1446269_at   | high mobility group box transcription factor 1          | 5.291      | 6.53E-06 |
| 1423635_at   | bone morphogenetic protein 2                            | 4.505      | 4.22E-05 |
| 1422833_at   | forkhead box A2                                         | 4.484      | 2.23E-04 |
| 1422912_at   | bone morphogenetic protein 4                            | 3.968      | 3.32E-07 |
| 1428816_a_at | GATA binding protein 2                                  | 3.953      | 2.18E-04 |
| 1416693_at   | forkhead box C2                                         | 3.817      | 6.93E-05 |
| 1441165_s_at | calyntenin 2                                            | 3.717      | 4.91E-05 |
| 1420085_at   | fibroblast growth factor 4                              | 3.717      | 5.74E-05 |
| 1448877_at   | distal-less homeobox 2                                  | 3.676      | 6.14E-06 |
| 1427489_at   | integrin alpha 8                                        | 3.676      | 4.72E-04 |
| 1417278_a_at | naked cuticle 1 homolog (Drosophila)                    | 3.676      | 3.60E-05 |
| 1421299_a_at | lymphoid enhancer binding factor 1                      | 3.623      | 1.99E-05 |
| 1416101_a_at | histone 1, H1c                                          | 3.584      | 5.13E-07 |
| 1445123_at   | Chromobox homolog 1 (Drosophila HP1 beta) (Cbx1), mRNA  | 3.460      | 2.56E-05 |
| 1419735_at   | casein kappa                                            | 3.425      | 6.93E-05 |
| 1435950_at   | hairless                                                | 3.390      | 3.00E-04 |
| 1439663_at   | Patched homolog 1 (Ptch1), mRNA                         | 3.390      | 1.22E-04 |
| 1420017_at   | tetraspanin 8                                           | 3.390      | 6.35E-05 |
| 1449559_at   | homeo box, msh-like 2                                   | 3.289      | 9.60E-05 |
| 1418471_at   | placental growth factor                                 | 3.257      | 1.94E-04 |
| 1452240_at   | bruno-like 4, RNA binding protein (Drosophila)          | 3.165      | 8.21E-05 |
| 1431166_at   | chromodomain helicase DNA binding protein 1             | 3.058      | 5.07E-05 |
| 1416003_at   | claudin 11                                              | 2.950      | 3.31E-06 |
| 1425425_a_at | Wnt inhibitory factor 1                                 | 2.874      | 4.74E-05 |
| 1422914_at   | trans-acting transcription factor 5                     | 2.865      | 2.56E-04 |
| 1449470_at   | distal-less homeobox 1                                  | 2.857      | 3.92E-07 |
| 1435790_at   | olfactomedin 2                                          | 2.817      | 3.11E-04 |
| 1449863_a_at | distal-less homeobox 5                                  | 2.725      | 1.43E-04 |
| 1437060_at   | olfactomedin 4                                          | 2.674      | 5.24E-04 |
| 1453131_at   | CD300 antigen like family member G                      | 2.591      | 5.74E-05 |
| 1443227_at   | basic leucine zipper and W2 domains 2                   | 2.584      | 7.53E-05 |
| 1421677_at   | fibroblast growth factor 20                             | 2.558      | 1.01E-05 |
| 1422655_at   | patched homolog 2                                       | 2.532      | 5.69E-06 |
| 1451629_at   | limb-bud and heart                                      | 2.494      | 1.07E-06 |
| 1437419_at   | BMP2 inducible kinase                                   | 2.469      | 3.54E-04 |
| 1423671_at   | delta/notch-like EGF-related receptor                   | 2.421      | 5.97E-05 |
| 1441350_at   | fibroblast growth factor 3                              | 2.410      | 1.66E-06 |
| 1434559_at   | syntaxin 3                                              | 2.398      | 5.66E-05 |
| 1450135_at   | frizzled homolog 3 (Drosophila)                         | 2.387      | 3.41E-05 |
| 1440274_at   | CAMP-GEFII                                              | 2.370      | 9.77E-06 |
| 1449049_at   | toll-like receptor 1                                    | 2.364      | 1.60E-04 |
| 1459720_x_at | Timeless interacting protein (Tipin), mRNA              | 2.353      | 2.61E-06 |
| 1443087_at   | CDC23 (cell division cycle 23, yeast, homolog)          | 2.304      | 5.15E-06 |
| 1450475_at   | distal-less homeobox 3                                  | 2.304      | 6.01E-04 |
| 1422985_at   | frizzled homolog 1 (Drosophila)                         | 2.273      | 3.29E-07 |
| 1424446_at   | armadillo repeat containing 7                           | 2.257      | 1.73E-04 |

|              |                                                                   |       |          |
|--------------|-------------------------------------------------------------------|-------|----------|
| 1435521_at   | Musashi homolog 2 (Drosophila)                                    | 2.252 | 3.75E-04 |
| 1433471_at   | transcription factor 7, T-cell specific                           | 2.252 | 1.68E-07 |
| 1422537_a_at | inhibitor of DNA binding 2                                        | 2.227 | 6.08E-04 |
| 1427328_a_at | CLIP associating protein 2                                        | 2.217 | 1.42E-04 |
| 1456746_a_at | Cd99 antigen-like 2                                               | 2.203 | 1.91E-05 |
| 1428014_at   | histone 1, H4h                                                    | 2.203 | 1.38E-04 |
| 1423259_at   | inhibitor of DNA binding 4                                        | 2.193 | 6.03E-05 |
| 1431053_at   | M-phase phosphoprotein 9                                          | 2.169 | 1.04E-04 |
| 1454086_a_at | LIM domain only 2                                                 | 2.160 | 1.16E-05 |
| 1448886_at   | GATA binding protein 3                                            | 2.151 | 8.15E-05 |
| 1416552_at   | Dppa5a, developmental pluripotency associated 5A, Esg1, ecat2     | 2.139 | 1.99E-04 |
| 1428424_at   | polycomb group ring finger 3                                      | 2.137 | 1.25E-04 |
| 1434593_at   | eukaryotic translation initiation factor 5A2                      | 2.128 | 1.26E-04 |
| 1456341_a_at | Kruppel-like factor 9                                             | 2.128 | 4.53E-04 |
| 1441339_at   | chromodomain helicase DNA binding protein 9                       | 2.123 | 2.81E-06 |
| 1421341_at   | axin2                                                             | 2.114 | 1.81E-05 |
| 1425611_a_at | cut-like 1 (Drosophila)                                           | 2.105 | 1.48E-04 |
| 1429217_at   | zinc finger protein 655                                           | 2.075 | 4.04E-04 |
| 1450082_s_at | ets variant gene 5                                                | 2.066 | 1.33E-05 |
| 1436218_at   | leucine-rich repeat-containing G protein-coupled receptor 6       | 2.066 | 4.98E-06 |
| 1445315_at   | WNK lysine deficient protein kinase 2                             | 2.066 | 6.16E-04 |
| 1430216_at   | zinc finger protein 292                                           | 2.058 | 9.40E-05 |
| 1449317_at   | CASP8 and FADD-like apoptosis regulator                           | 2.053 | 4.70E-05 |
| 1427540_at   | ZW10 interactor                                                   | 2.045 | 9.09E-06 |
| 1448925_at   | twist homolog 2 (Drosophila)                                      | 2.033 | 3.61E-04 |
| 1419380_at   | zinc finger protein 423                                           | 2.024 | 3.69E-06 |
| 1441938_x_at | Cdk5 and Abl enzyme substrate 1                                   | 2.020 | 4.31E-05 |
| 1455280_at   | Fras1 related extracellular matrix protein 1                      | 2.016 | 2.64E-05 |
| 1440086_at   | ring finger protein 182                                           | 2.000 | 4.71E-04 |
| 1437904_at   | developmentally regulated RNA binding protein 1                   | 1.965 | 4.06E-04 |
| 1446259_at   | CD180 antigen (Cd180), mRNA                                       | 1.961 | 3.54E-05 |
| 1437395_at   | zinc finger, CCHC domain containing 11                            | 1.961 | 1.08E-04 |
| 1427526_at   | FGFR1 oncogene partner 2                                          | 1.949 | 1.02E-04 |
| 1455823_at   | Bardet-Biedl syndrome 4 homolog (human)                           | 1.942 | 2.27E-04 |
| 1438815_at   | histone 2, H2aa2                                                  | 1.927 | 5.80E-04 |
| 1419848_x_at | toll-like receptor 7                                              | 1.927 | 3.30E-06 |
| 1460725_at   | xeroderma pigmentosum, complementation group A                    | 1.927 | 5.50E-05 |
| 1448158_at   | syndecan 1                                                        | 1.923 | 5.95E-06 |
| 1416129_at   | ERBB receptor feedback inhibitor 1                                | 1.919 | 1.82E-05 |
| 1448742_at   | snail homolog 1 (Drosophila)                                      | 1.916 | 6.53E-05 |
| 1443962_at   | transcription factor Dp 2                                         | 1.916 | 2.60E-04 |
| 1452021_a_at | hairy and enhancer of split 6 (Drosophila)                        | 1.908 | 4.75E-06 |
| 1425895_a_at | inhibitor of DNA binding 1                                        | 1.905 | 5.82E-04 |
| 1457276_at   | SNF1-like kinase 2                                                | 1.894 | 4.21E-06 |
| 1453688_at   | CWF19-like 2, cell cycle control (S. pombe)                       | 1.890 | 1.17E-04 |
| 1457586_at   | RAS p21 protein activator 2 (Rasa2), mRNA                         | 1.873 | 5.35E-05 |
| 1436469_at   | Bromodomain containing 7 (Brd7), mRNA                             | 1.862 | 4.86E-04 |
| 1434196_at   | DnaJ (Hsp40) homolog, subfamily A, member 4                       | 1.862 | 4.81E-05 |
| 1455717_s_at | dishevelled associated activator of morphogenesis 2               | 1.859 | 1.78E-04 |
| 1416451_s_at | taube nuss                                                        | 1.859 | 1.94E-05 |
| 1437162_at   | GPI-anchored membrane protein 1 (Gpiap1), mRNA                    | 1.855 | 2.13E-05 |
| 1445314_at   | ets variant gene 1                                                | 1.852 | 2.01E-04 |
| 1459910_at   | tankyrase, TRF1-interacting ankyrin-related ADP-ribose polymerase | 1.845 | 3.65E-05 |
| 1416630_at   | inhibitor of DNA binding 3                                        | 1.825 | 2.65E-05 |
| 1424614_at   | FGF receptor activating protein 1                                 | 1.818 | 4.43E-05 |
| 1429634_at   | zinc finger protein 580                                           | 1.815 | 1.05E-04 |
| 1443002_at   | zinc finger RNA binding protein                                   | 1.805 | 2.92E-04 |
| 1429962_at   | CCAAT/enhancer binding protein zeta                               | 1.799 | 5.56E-05 |
| 1457327_at   | SNF2 histone linker PHD RING helicase                             | 1.786 | 7.95E-07 |
| 1457038_at   | Fras1 related extracellular matrix protein 2                      | 1.783 | 2.94E-05 |
| 1443471_at   | zinc finger and BTB domain containing 20                          | 1.783 | 2.02E-04 |
| 1425107_a_at | leukemia inhibitory factor receptor                               | 1.779 | 2.04E-05 |

|              |                                                                   |       |          |
|--------------|-------------------------------------------------------------------|-------|----------|
| 1451281_at   | zinc finger protein 96                                            | 1.779 | 2.41E-05 |
| 1422031_a_at | zinc finger, A20 domain containing 3                              | 1.779 | 2.10E-04 |
| 1422470_at   | BCL2/adenovirus E1B 19kDa-interacting protein 1, NIP3             | 1.776 | 2.68E-06 |
| 1419816_s_at | ERBB receptor feedback inhibitor 1                                | 1.776 | 1.02E-04 |
| 1428574_a_at | chimerin (chimaerin) 2                                            | 1.770 | 3.75E-04 |
| 1424074_at   | basic transcription factor 3-like 4                               | 1.767 | 7.20E-08 |
| 1419716_a_at | POU domain, class 2, transcription factor 1                       | 1.764 | 2.12E-04 |
| 1456351_at   | bromodomain containing 8                                          | 1.761 | 2.27E-04 |
| 1448662_at   | frizzled homolog 6 (Drosophila)                                   | 1.754 | 3.08E-04 |
| 1425464_at   | GATA binding protein 6                                            | 1.751 | 2.84E-04 |
| 1418176_at   | vitamin D receptor                                                | 1.748 | 8.72E-07 |
| 1429399_at   | ring finger protein 125                                           | 1.745 | 4.02E-05 |
| 1441467_at   | Tetraspanin 5 (Tspan5), mRNA                                      | 1.730 | 9.28E-05 |
| 1417958_at   | tetraspan 1                                                       | 1.727 | 2.04E-07 |
| 1455188_at   | Eph receptor B1                                                   | 1.724 | 3.03E-05 |
| 1443240_at   | Glypican 3, mRNA (cDNA clone MGC:35964 IMAGE:4973409)             | 1.724 | 3.22E-04 |
| 1423040_at   | basic leucine zipper and W2 domains 1                             | 1.721 | 1.81E-04 |
| 1428253_at   | chromatin modifying protein 2B                                    | 1.715 | 2.73E-05 |
| 1419144_at   | CD163 antigen                                                     | 1.712 | 1.82E-06 |
| 1440341_at   | Colony stimulating factor 1 receptor (Csf1r), mRNA                | 1.712 | 3.25E-04 |
| 1434033_at   | transducin-like enhancer of split 1, homolog of Drosophila E(spl) | 1.712 | 2.02E-05 |
| 1427300_at   | LIM homeobox protein 8                                            | 1.706 | 9.39E-06 |
| 1427200_at   | zinc finger, RAN-binding domain containing 1                      | 1.698 | 3.45E-06 |
| 1449314_at   | zinc finger protein, multitype 2                                  | 1.678 | 1.32E-05 |
| 1444667_at   | bromodomain, testis-specific                                      | 1.675 | 9.94E-05 |
| 1448789_at   | aldehyde dehydrogenase family 1, subfamily A3                     | 1.667 | 2.33E-05 |
| 1417182_at   | DnaJ (Hsp40) homolog, subfamily A, member 2                       | 1.664 | 3.22E-04 |
| 1438239_at   | midline 1                                                         | 1.661 | 1.63E-05 |
| 1448147_at   | tumor necrosis factor receptor superfamily, member 19             | 1.661 | 6.21E-05 |
| 1428396_at   | SMAD specific E3 ubiquitin protein ligase 1                       | 1.658 | 1.14E-04 |
| 1447944_at   | zinc finger with KRAB and SCAN domains 1                          | 1.658 | 2.19E-04 |
| 1419368_a_at | ring finger protein 138                                           | 1.656 | 1.03E-04 |
| 1457441_at   | early B-cell factor 1                                             | 1.647 | 3.28E-06 |
| 1426152_a_at | kit ligand                                                        | 1.647 | 7.29E-07 |
| 1451191_at   | cellular retinoic acid binding protein II                         | 1.639 | 1.13E-04 |
| 1418147_at   | transcription factor AP-2, gamma                                  | 1.639 | 7.92E-08 |
| 1426151_a_at | syntaxin 3                                                        | 1.634 | 5.37E-05 |
| 1448042_s_at | Rnf2, ring finger protein 2 AI326319, AI450156, AU019207, Ring1B  | 1.626 | 2.80E-05 |
| 1441042_at   | fibroblast growth factor 1                                        | 1.626 | 2.01E-04 |
| 1421412_at   | goosecoid                                                         | 1.626 | 6.17E-06 |
| 1420615_at   | ash2 (absent, small, or homeotic)-like (Drosophila)               | 1.626 | 1.07E-05 |
| 1458450_at   | zinc finger RNA binding protein                                   | 1.623 | 1.21E-05 |
| 1423702_at   | H1 histone family, member 0                                       | 1.621 | 5.80E-06 |
| 1422932_a_at | vav 1 oncogene                                                    | 1.621 | 5.27E-07 |
| 1418671_at   | calpain 5                                                         | 1.616 | 4.40E-04 |
| 1422021_at   | sprouty homolog 4 (Drosophila)                                    | 1.613 | 5.05E-05 |
| 1448366_at   | syntaxin 1A (brain)                                               | 1.613 | 6.67E-06 |
| 1440585_at   | syntaxin 6                                                        | 1.613 | 1.76E-04 |
| 1460441_at   | zinc finger, X-linked, duplicated A                               | 1.613 | 6.27E-06 |
| 1434949_at   | armadillo repeat containing 8                                     | 1.608 | 6.70E-05 |
| 1427956_at   | polycomb group ring finger 1                                      | 1.608 | 1.37E-04 |
| 1416111_at   | CD83 antigen                                                      | 1.603 | 6.06E-07 |
| 1427941_at   | Dicer1, Dcr-1 homolog (Drosophila)                                | 1.603 | 1.48E-06 |
| 1427454_at   | homeo box C6                                                      | 1.603 | 7.72E-05 |
| 1451739_at   | Kruppel-like factor 5                                             | 1.603 | 5.55E-08 |
| 1417839_at   | claudin 5                                                         | 1.600 | 3.16E-04 |
| 1425555_at   | CDC2-related kinase 7                                             | 1.597 | 8.02E-06 |
| 1441544_at   | Cyclin M3 (Cnm3), mRNA                                            | 1.597 | 2.81E-07 |
| 1421298_a_at | homeodomain interacting protein kinase 1                          | 1.597 | 1.29E-04 |
| 1446349_at   | zinc finger protein 78                                            | 1.597 | 4.09E-06 |
| 1421943_at   | transforming growth factor alpha                                  | 1.595 | 2.78E-06 |
| 1446048_at   | Cadherin 11 (Cdh11), mRNA                                         | 1.592 | 5.51E-05 |

|              |                                                                     |       |          |
|--------------|---------------------------------------------------------------------|-------|----------|
| 1427618_at   | cadherin 9                                                          | 1.592 | 2.44E-06 |
| 1435903_at   | CD300A antigen                                                      | 1.592 | 1.17E-05 |
| 1416895_at   | ephrin A1                                                           | 1.592 | 7.44E-06 |
| 1454880_s_at | Bcl2 modifying factor                                               | 1.590 | 1.52E-04 |
| 1451156_s_at | very low density lipoprotein receptor                               | 1.590 | 2.75E-04 |
| 1423528_at   | breast carcinoma amplified sequence 3                               | 1.585 | 4.32E-05 |
| 1429086_at   | grainyhead-like 2 (Drosophila)                                      | 1.585 | 6.98E-05 |
| 1419126_at   | homeo box D9                                                        | 1.585 | 2.65E-04 |
| 1418213_at   | keratin complex 1, acidic, gene 23                                  | 1.585 | 2.44E-07 |
| 1419356_at   | Kruppel-like factor 7 (ubiquitous)                                  | 1.582 | 1.14E-04 |
| 1420376_a_at | H3 histone, family 3B                                               | 1.580 | 2.89E-05 |
| 1438495_at   | topoisomerase (DNA) I                                               | 1.580 | 1.27E-04 |
| 1425693_at   | Braf transforming gene                                              | 1.577 | 4.40E-06 |
| 1442757_at   | leucine-rich repeats and calponin homology (CH) domain containing 1 | 1.577 | 1.37E-06 |
| 1449732_at   | zinc finger proliferation 1                                         | 1.575 | 9.62E-05 |
| 1434234_at   | zinc finger protein 341                                             | 1.575 | 3.62E-06 |
| 1444328_at   | clathrin, light polypeptide (Lca)                                   | 1.572 | 6.46E-06 |
| 1424355_a_at | transcriptional regulator, SIN3B (yeast)                            | 1.570 | 2.90E-06 |
| 1421151_a_at | Eph receptor A2                                                     | 1.567 | 2.96E-04 |
| 1439638_at   | ErbB2 interacting protein                                           | 1.567 | 2.09E-06 |
| 1419874_x_at | zinc finger and BTB domain containing 16                            | 1.567 | 9.97E-05 |
| 1426753_at   | PHD finger protein 17                                               | 1.565 | 1.66E-06 |
| 1453247_at   | zinc fingerprotein 618                                              | 1.565 | 9.53E-06 |
| 1416511_a_at | CDC42 effector protein (Rho GTPase binding) 4                       | 1.563 | 2.55E-04 |
| 1418285_at   | ephrin B1                                                           | 1.563 | 2.82E-05 |
| 1417394_at   | Kruppel-like factor 4 (gut)                                         | 1.563 | 1.25E-05 |
| 1455658_at   | CGG triplet repeat binding protein 1                                | 1.560 | 3.24E-05 |
| 1452718_at   | E3 ubiquitin protein ligase, HECT domain containing, 1              | 1.560 | 8.96E-05 |
| 1426332_a_at | claudin 3                                                           | 1.558 | 6.84E-04 |
| 1439079_a_at | ErbB2 interacting protein                                           | 1.558 | 3.88E-06 |
| 1448765_at   | Fyn proto-oncogene                                                  | 1.555 | 1.46E-05 |
| 1418478_at   | LIM domain only 1                                                   | 1.555 | 2.93E-06 |
| 1426981_at   | proprotein convertase subtilisin/kexin type 6                       | 1.550 | 4.61E-06 |
| 1428034_a_at | tumor necrosis factor receptor superfamily, member 9                | 1.548 | 7.45E-06 |
| 1424298_at   | zinc finger protein 282                                             | 1.548 | 4.77E-06 |
| 1419474_a_at | ets homologous factor                                               | 1.546 | 2.94E-07 |
| 1424638_at   | cyclin-dependent kinase inhibitor 1A (P21)                          | 1.543 | 4.10E-04 |
| 1434370_s_at | Fas-associated factor 1                                             | 1.543 | 4.14E-07 |
| 1418581_a_at | LIM motif-containing protein kinase 2                               | 1.543 | 9.36E-05 |
| 1437657_at   | zinc finger protein 291                                             | 1.543 | 7.10E-06 |
| 1454305_at   | chromobox homolog 3 (Drosophila HP1 gamma)                          | 1.541 | 7.20E-04 |
| 1455368_at   | zinc finger, DHHC domain containing 3                               | 1.541 | 4.87E-05 |
| 1423805_at   | disabled homolog 2 (Drosophila)                                     | 1.538 | 5.69E-07 |
| 1453848_s_at | zinc finger, BED domain containing 3                                | 1.538 | 6.44E-06 |
| 1421005_at   | centrosomal protein 1                                               | 1.536 | 1.13E-05 |
| 1457577_at   | Ephrin B2 (Efnb2), mRNA                                             | 1.536 | 7.94E-05 |
| 1424127_at   | eyes absent 2 homolog (Drosophila)                                  | 1.536 | 2.93E-06 |
| 1441635_at   | Germ cell nuclear factor protein (Nr6a1)                            | 1.536 | 2.42E-05 |
| 1455725_a_at | H3 histone, family 3B                                               | 1.536 | 5.76E-05 |
| 1419654_at   | transducin-like enhancer of split 3, homolog of Drosophila E(spl)   | 1.536 | 3.29E-05 |
| 1428634_at   | TWIST neighbor                                                      | 1.536 | 1.89E-04 |
| 1456639_at   | zinc finger protein 398                                             | 1.536 | 1.56E-05 |
| 1451696_at   | zinc finger protein 64                                              | 1.536 | 2.78E-08 |
| 1449126_at   | zinc finger protein 90                                              | 1.536 | 1.66E-06 |
| 1425092_at   | cadherin 10                                                         | 1.534 | 3.09E-05 |
| 1439019_at   | Fraser syndrome 1 homolog (human)                                   | 1.531 | 1.02E-05 |
| 1431993_a_at | ring finger protein 38                                              | 1.531 | 1.60E-04 |
| 1444246_at   | chromodomain helicase DNA binding protein 2                         | 1.527 | 9.26E-07 |
| 1433507_a_at | high mobility group nucleosomal binding domain 2                    | 1.527 | 2.05E-07 |
| 1450267_at   | toll-like receptor 8                                                | 1.527 | 2.62E-05 |
| 1428378_at   | zinc finger CCCH type, antiviral 1                                  | 1.527 | 7.87E-06 |
| 1452504_s_at | chitinase, di-N-acetyl-                                             | 1.524 | 2.97E-05 |

|              |                                                            |       |          |
|--------------|------------------------------------------------------------|-------|----------|
| 1426124_a_at | CDC-like kinase 1                                          | 1.522 | 4.48E-04 |
| 1423203_a_at | centrin 1                                                  | 1.520 | 3.93E-05 |
| 1453415_at   | zinc finger CCCH type containing 6                         | 1.520 | 3.85E-05 |
| 1419307_at   | tumor necrosis factor receptor superfamily, member 13c     | 1.517 | 1.26E-05 |
| 1435071_at   | zinc finger, FYVE domain containing 1                      | 1.517 | 5.08E-05 |
| 1439080_at   | ErbB2 interacting protein                                  | 1.515 | 2.55E-04 |
| 1435608_at   | zinc and ring finger 3                                     | 1.515 | 7.58E-06 |
| 1434236_at   | zinc finger, DHHC domain containing 20                     | 1.515 | 3.33E-06 |
| 1437201_at   | leucine rich repeat containing 4C                          | 1.513 | 1.23E-06 |
| 1419369_at   | ring finger protein 138                                    | 1.513 | 6.77E-05 |
| 1456912_at   | zinc finger protein 691                                    | 1.513 | 2.30E-05 |
| 1420745_a_at | cyclin D-type binding-protein 1                            | 1.511 | 3.78E-04 |
| 1445635_at   | Eph receptor A7, mRNA (cDNA clone MGC:14056 IMAGE:3991628) | 1.508 | 4.73E-07 |
| 1449295_at   | transcriptional regulator protein                          | 1.508 | 2.84E-05 |
| 1434651_a_at | claudin 3                                                  | 1.506 | 6.78E-05 |
| 1421604_a_at | Kruppel-like factor 3 (basic)                              | 1.506 | 1.12E-05 |
| 1425635_at   | tyrosine kinase, non-receptor, 1                           | 1.506 | 3.03E-04 |
| 1420675_at   | zinc finger protein 113                                    | 0.664 | 3.65E-04 |
| 1429111_at   | talin 2                                                    | 0.663 | 1.39E-06 |
| 1448837_at   | villin 1                                                   | 0.663 | 8.08E-06 |
| 1416757_at   | Zwilch, kinetochore associated, homolog (Drosophila)       | 0.663 | 1.95E-04 |
| 1459009_at   | Utrophin                                                   | 0.662 | 3.35E-07 |
| 1424789_at   | GLI-Kruppel family member HKR2                             | 0.661 | 3.29E-04 |
| 1434824_at   | bromodomain adjacent to zinc finger domain, 1B             | 0.661 | 4.18E-04 |
| 1459589_at   | crystallin, lamda 1                                        | 0.658 | 4.71E-04 |
| 1419979_s_at | cAMP responsive element binding protein 3                  | 0.657 | 4.54E-04 |
| 1433592_at   | calmodulin 1                                               | 0.657 | 1.00E-06 |
| 1419573_a_at | lectin, galactose binding, soluble 1                       | 0.656 | 4.00E-05 |
| 1445534_at   | Filamin, beta, mRNA (cDNA clone IMAGE:3488025)             | 0.655 | 8.48E-05 |
| 1438861_at   | basonuclin 2                                               | 0.654 | 1.49E-07 |
| 1420631_a_at | bladder cancer associated protein homolog (human)          | 0.654 | 3.66E-05 |
| 1449233_at   | basic helix-loop-helix domain containing, class B, 8       | 0.652 | 3.29E-04 |
| 1438498_at   | zinc finger, MYND domain containing 15                     | 0.652 | 3.31E-04 |
| 1423505_at   | transgelin                                                 | 0.651 | 2.61E-05 |
| 1451537_at   | chitinase 3-like 1                                         | 0.651 | 3.94E-06 |
| 1452968_at   | collagen triple helix repeat containing 1                  | 0.650 | 1.38E-04 |
| 1448594_at   | WNT1 inducible signaling pathway protein 1                 | 0.648 | 8.58E-06 |
| 1417067_s_at | chaperone, ABC1 activity of bc1 complex like (S. pombe)    | 0.648 | 7.80E-06 |
| 1422748_at   | zinc finger homeobox 1b                                    | 0.647 | 2.61E-06 |
| 1441198_at   | zinc finger protein 39                                     | 0.647 | 2.92E-05 |
| 1458141_at   | CAMP specific phosphodiesterase 7B (PDE7B gene)            | 0.646 | 7.38E-05 |
| 1416246_a_at | coronin, actin binding protein 1A                          | 0.646 | 4.05E-06 |
| 1421251_at   | zinc finger protein 40                                     | 0.646 | 2.28E-04 |
| 1456405_at   | death inducer-obliterator 1                                | 0.645 | 3.87E-05 |
| 1450416_at   | chromobox homolog 5 (Drosophila HP1a)                      | 0.641 | 1.26E-04 |
| 1452265_at   | CLIP associating protein 1                                 | 0.641 | 8.21E-06 |
| 1417457_at   | CDC28 protein kinase regulatory subunit 2                  | 0.641 | 8.39E-05 |
| 1422308_a_at | lectin, galactose binding, soluble 7                       | 0.641 | 1.36E-04 |
| 1438817_at   | DNA2 DNA replication helicase 2-like (yeast)               | 0.640 | 3.07E-06 |
| 1426808_at   | lectin, galactose binding, soluble 3                       | 0.640 | 3.30E-05 |
| 1424698_s_at | grancalcin                                                 | 0.639 | 4.38E-04 |
| 1438833_at   | cancer susceptibility candidate 5                          | 0.638 | 7.64E-07 |
| 1437643_at   | centromere protein J                                       | 0.638 | 1.63E-04 |
| 1428460_at   | synapsin II                                                | 0.637 | 3.34E-05 |
| 1416265_at   | calpain 10                                                 | 0.637 | 1.61E-04 |
| 1448289_at   | collapsin response mediator protein 1                      | 0.637 | 6.31E-05 |
| 1420863_at   | dynactin 4                                                 | 0.637 | 4.92E-05 |
| 1423691_x_at | keratin complex 2, basic, gene 8                           | 0.637 | 1.20E-05 |
| 1427884_at   | procollagen, type III, alpha 1                             | 0.635 | 6.14E-06 |
| 1435781_at   | cullin associated and neddylation disassociated 1          | 0.632 | 1.20E-06 |
| 1456483_at   | zinc finger protein 9                                      | 0.629 | 4.69E-04 |
| 1424629_at   | breast cancer 1                                            | 0.627 | 1.67E-05 |

|              |                                                                      |       |          |
|--------------|----------------------------------------------------------------------|-------|----------|
| 1430139_at   | helicase, lymphoid specific                                          | 0.627 | 5.52E-06 |
| 1439436_x_at | inner centromere protein                                             | 0.626 | 2.64E-05 |
| 1439945_at   | zinc finger protein 449                                              | 0.626 | 2.08E-05 |
| 1418133_at   | B-cell leukemia/lymphoma 3                                           | 0.626 | 4.41E-05 |
| 1441375_at   | Leucine-rich repeats and immunoglobulin-like domains 1 (Lrig1), mRNA | 0.623 | 7.33E-05 |
| 1422279_at   | Friend virus susceptibility 1                                        | 0.622 | 2.81E-06 |
| 1418495_at   | zinc finger CCCH type containing 8                                   | 0.620 | 3.50E-06 |
| 1433623_at   | zinc finger protein 367                                              | 0.620 | 1.09E-04 |
| 1422481_at   | keratin complex 2, basic, gene 1                                     | 0.620 | 1.36E-07 |
| 1454849_x_at | clusterin                                                            | 0.618 | 4.51E-05 |
| 1427290_at   | keratin complex 2, basic, gene 19                                    | 0.614 | 5.50E-05 |
| 1434201_at   | Chordin-like 1 (Chrdl1), mRNA                                        | 0.612 | 1.76E-07 |
| 1450536_s_at | keratin associated protein 12-1                                      | 0.612 | 4.51E-06 |
| 1425356_at   | zinc finger protein 142                                              | 0.612 | 2.80E-05 |
| 1439407_x_at | transgelin 2                                                         | 0.611 | 8.05E-07 |
| 1437788_at   | trans-acting transcription factor 6                                  | 0.609 | 2.49E-04 |
| 1439631_at   | zinc finger, CCHC domain containing 11                               | 0.608 | 1.70E-05 |
| 1450842_a_at | centromere autoantigen A                                             | 0.604 | 9.42E-05 |
| 1439030_at   | GDP-mannose pyrophosphorylase B                                      | 0.604 | 1.01E-05 |
| 1428503_a_at | NFKB inhibitor interacting Ras-like protein 1                        | 0.598 | 1.20E-04 |
| 1416083_at   | zinc finger, A20 domain containing 2                                 | 0.597 | 1.56E-05 |
| 1418735_at   | keratin complex 2, basic, gene 4                                     | 0.597 | 6.76E-05 |
| 1436095_at   | chromodomain helicase DNA binding protein 5                          | 0.596 | 7.68E-05 |
| 1428650_at   | tensin 1                                                             | 0.596 | 1.99E-04 |
| 1448467_a_at | tangerin                                                             | 0.595 | 8.37E-07 |
| 1421460_at   | desmocollin 1                                                        | 0.593 | 1.00E-04 |
| 1427366_at   | keratin associated protein 3-1                                       | 0.593 | 1.01E-05 |
| 1437355_at   | zinc finger, CCHC domain containing 5                                | 0.592 | 1.31E-04 |
| 1451484_a_at | synapsin I                                                           | 0.585 | 4.82E-06 |
| 1437685_x_at | fibromodulin                                                         | 0.580 | 1.25E-06 |
| 1451637_a_at | mucin 10, submandibular gland salivary mucin                         | 0.579 | 1.02E-04 |
| 1451997_at   | zinc finger protein 426                                              | 0.578 | 3.35E-06 |
| 1455187_at   | zinc finger and BTB domain containing 40                             | 0.576 | 8.66E-06 |
| 1444043_at   | GLI-Kruppel family member GLI3 (Gli3), mRNA                          | 0.569 | 6.45E-06 |
| 1418608_at   | calmodulin-like 3                                                    | 0.567 | 8.83E-05 |
| 1455113_at   | armadillo repeat containing 8                                        | 0.562 | 9.25E-07 |
| 1427348_at   | zinc finger CCCH type containing 12A                                 | 0.562 | 1.07E-04 |
| 1417878_at   | E2F transcription factor 1                                           | 0.561 | 2.93E-05 |
| 1429347_at   | Bcl2-like 14 (apoptosis facilitator)                                 | 0.558 | 2.01E-05 |
| 1426471_at   | zinc finger protein 52                                               | 0.557 | 1.19E-04 |
| 1424407_s_at | chromobox homolog 6                                                  | 0.555 | 2.19E-05 |
| 1417917_at   | calponin 1                                                           | 0.554 | 9.53E-06 |
| 1425705_a_at | ERO1-like beta ( <i>S. cerevisiae</i> )                              | 0.554 | 1.60E-05 |
| 1418091_at   | transcription factor CP2-like 1                                      | 0.553 | 5.57E-05 |
| 1415948_at   | cellular repressor of E1A-stimulated genes 1                         | 0.549 | 1.78E-04 |
| 1439040_at   | centromere protein E                                                 | 0.549 | 3.95E-06 |
| 1430669_at   | keratin associated protein 4-7                                       | 0.547 | 5.97E-05 |
| 1457571_at   | zinc finger protein 68                                               | 0.546 | 3.41E-07 |
| 1447812_x_at | filamin C, gamma (actin binding protein 280)                         | 0.544 | 1.82E-05 |
| 1423809_at   | transcription factor 19                                              | 0.542 | 2.08E-05 |
| 1417552_at   | fibroblast activation protein                                        | 0.540 | 1.44E-04 |
| 1422747_at   | CHK2 checkpoint homolog ( <i>S. pombe</i> )                          | 0.536 | 5.71E-07 |
| 1448788_at   | Cd200 antigen                                                        | 0.532 | 4.32E-04 |
| 1433862_at   | extra spindle poles-like 1 ( <i>S. cerevisiae</i> )                  | 0.532 | 6.56E-08 |
| 1427179_at   | keratin complex 1, acidic, gene 3                                    | 0.528 | 4.73E-06 |
| 1451611_at   | HRAS like suppressor 3                                               | 0.526 | 9.14E-07 |
| 1422582_at   | leptin                                                               | 0.525 | 3.82E-04 |
| 1452166_a_at | keratin complex 1, acidic, gene 10                                   | 0.519 | 1.51E-04 |
| 1455642_a_at | tetraspanin 17                                                       | 0.519 | 3.56E-06 |
| 1424218_a_at | cAMP responsive element binding protein 3-like 4                     | 0.518 | 9.73E-06 |
| 1419295_at   | cAMP responsive element binding protein 3-like 1                     | 0.517 | 6.05E-06 |
| 1418063_at   | keratocan                                                            | 0.515 | 7.97E-05 |

|              |                                                                   |       |          |
|--------------|-------------------------------------------------------------------|-------|----------|
| 1436186_at   | E2F transcription factor 8                                        | 0.515 | 2.98E-06 |
| 1433681_x_at | calpain 3                                                         | 0.515 | 2.94E-05 |
| 1460082_at   | inhibitor of growth family, member 3                              | 0.512 | 9.59E-05 |
| 1448835_at   | E2F transcription factor 6                                        | 0.505 | 1.37E-05 |
| 1457275_at   | desmuslin                                                         | 0.501 | 3.13E-04 |
| 1442140_at   | tenascin N                                                        | 0.500 | 1.10E-05 |
| 1418440_at   | procollagen, type VIII, alpha 1                                   | 0.499 | 4.76E-07 |
| 1422954_at   | zinc finger protein 60                                            | 0.497 | 5.33E-06 |
| 1440770_at   | B-cell leukemia/lymphoma 2                                        | 0.494 | 2.40E-05 |
| 1434573_at   | TRAF3 interacting protein 3                                       | 0.494 | 1.51E-05 |
| 1442542_at   | eyes absent 4 homolog (Drosophila)                                | 0.493 | 2.16E-04 |
| 1446636_at   | tensin 3                                                          | 0.492 | 2.19E-05 |
| 1418804_at   | succinate receptor 1                                              | 0.491 | 1.27E-06 |
| 1424567_at   | tetraspan 2                                                       | 0.490 | 2.87E-05 |
| 1427161_at   | centromere autoantigen F                                          | 0.480 | 2.36E-05 |
| 1443931_at   | Zinc finger protein 617 (Zfp617), mRNA                            | 0.478 | 8.22E-07 |
| 1418093_a_at | epidermal growth factor                                           | 0.473 | 1.73E-04 |
| 1425262_at   | CCAAT/enhancer binding protein (C/EBP), gamma                     | 0.469 | 2.45E-04 |
| 1417268_at   | CD14 antigen                                                      | 0.469 | 5.95E-04 |
| 1419521_at   | zinc finger protein 94                                            | 0.464 | 4.15E-04 |
| 1431035_at   | dishevelled associated activator of morphogenesis 1               | 0.464 | 1.75E-05 |
| 1417644_at   | sarcospan                                                         | 0.464 | 6.85E-05 |
| 1457424_at   | eyes absent 1 homolog (Drosophila)                                | 0.462 | 3.80E-05 |
| 1426180_a_at | submaxillary gland androgen regulated protein 2                   | 0.462 | 5.01E-08 |
| 1445256_at   | Vinculin, mRNA (cDNA clone MGC:6134 IMAGE:3495710)                | 0.460 | 6.82E-06 |
| 1421355_at   | transglutaminase 3, E polypeptide                                 | 0.456 | 5.05E-05 |
| 1429067_at   | calpain, small subunit 2                                          | 0.444 | 3.33E-04 |
| 1428052_a_at | zinc finger, MYM domain containing 1                              | 0.444 | 4.19E-05 |
| 1437095_at   | tetraspanin 18                                                    | 0.442 | 3.24E-06 |
| 1454884_at   | BTB (POZ) domain containing 4                                     | 0.439 | 4.01E-04 |
| 1435005_at   | centromere protein E                                              | 0.433 | 5.74E-06 |
| 1425237_at   | keratin associated protein 16-8                                   | 0.421 | 2.05E-05 |
| 1420358_at   | keratin associated protein 13                                     | 0.418 | 2.25E-08 |
| 1445032_at   | Death associated protein kinase 1 (Dapk1), mRNA                   | 0.418 | 3.63E-05 |
| 1416025_at   | fibrinogen, gamma polypeptide                                     | 0.416 | 9.41E-06 |
| 1431727_at   | submandibular gland protein C                                     | 0.411 | 1.39E-05 |
| 1417686_at   | lectin, galactose binding, soluble 12                             | 0.407 | 3.79E-04 |
| 1422814_at   | asp (abnormal spindle)-like, microcephaly associated (Drosophila) | 0.404 | 2.19E-05 |
| 1456228_x_at | myelin basic protein                                              | 0.404 | 7.48E-05 |
| 1416658_at   | frizzled-related protein                                          | 0.401 | 1.78E-04 |
| 1460218_at   | CD52 antigen                                                      | 0.397 | 3.00E-05 |
| 1416342_at   | tenascin C                                                        | 0.391 | 1.18E-04 |
| 1449919_at   | keratin associated protein 6-2                                    | 0.382 | 6.36E-06 |
| 1455519_at   | desmoglein 1 beta                                                 | 0.375 | 1.56E-06 |
| 1423010_at   | sacsin                                                            | 0.358 | 2.16E-04 |
| 1421691_at   | keratin associated protein 16-7                                   | 0.357 | 9.29E-07 |
| 1420466_at   | salivary protein 2                                                | 0.351 | 1.37E-05 |
| 1424528_at   | cell growth regulator with EF hand domain 1                       | 0.347 | 1.28E-05 |
| 1421855_at   | fibrinogen-like protein 2                                         | 0.342 | 7.62E-05 |
| 1450633_at   | calmodulin 4                                                      | 0.342 | 9.47E-06 |
| 1429540_at   | cornifelin                                                        | 0.339 | 2.71E-06 |
| 1430731_at   | keratin associated protein 2-4                                    | 0.336 | 5.41E-07 |
| 1424531_a_at | transcription elongation factor A (SII), 3                        | 0.331 | 3.45E-06 |
| 1449073_at   | filamin C, gamma (actin binding protein 280)                      | 0.317 | 1.27E-06 |
| 1422640_at   | protocadherin beta 9                                              | 0.315 | 6.16E-04 |
| 1459897_a_at | suprabasin                                                        | 0.313 | 2.81E-06 |
| 1424529_s_at | cell growth regulator with EF hand domain 1                       | 0.309 | 1.40E-06 |
| 1422837_at   | sciellin                                                          | 0.308 | 1.19E-04 |
| 1455900_x_at | transglutaminase 2, C polypeptide                                 | 0.302 | 3.11E-06 |
| 1443745_s_at | dentin matrix protein 1                                           | 0.291 | 8.52E-06 |
| 1416455_a_at | crystallin, alpha B                                               | 0.287 | 1.11E-05 |
| 1421589_at   | keratin complex 1, acidic, gene 1                                 | 0.286 | 7.06E-08 |

|              |                                                            |       |          |
|--------------|------------------------------------------------------------|-------|----------|
| 1420183_at   | Loricrin (Lor), mRNA                                       | 0.273 | 4.86E-07 |
| 1431255_at   | calreticulin 3                                             | 0.244 | 5.08E-05 |
| 1426043_a_at | calpain 3                                                  | 0.218 | 3.23E-07 |
| 1418314_a_at | ataxin 2 binding protein 1                                 | 0.212 | 2.01E-04 |
| 1417979_at   | tenomodulin                                                | 0.207 | 1.70E-04 |
| 1435649_at   | nexilin                                                    | 0.203 | 2.10E-08 |
| 1423253_at   | myelin protein zero                                        | 0.201 | 1.11E-04 |
| 1422588_at   | keratin complex 2, basic, gene 6b                          | 0.198 | 5.57E-05 |
| 1458000_at   | desmoglein 1 alpha                                         | 0.197 | 6.25E-06 |
| 1422654_at   | sarcoglycan, alpha (dystrophin-associated glycoprotein)    | 0.186 | 2.34E-05 |
| 1445824_at   | zinc finger protein 458                                    | 0.186 | 8.34E-06 |
| 1416776_at   | crystallin, mu                                             | 0.180 | 3.79E-05 |
| 1420751_at   | keratin associated protein 6-1                             | 0.180 | 2.99E-07 |
| 1422529_s_at | calsequestrin 2                                            | 0.167 | 1.99E-05 |
| 1448168_a_at | salivary protein 1                                         | 0.164 | 9.03E-05 |
| 1427735_a_at | actin, alpha 1, skeletal muscle                            | 0.162 | 2.09E-07 |
| 1418413_at   | caveolin 3                                                 | 0.157 | 1.55E-06 |
| 1459266_at   | ARP3 actin-related protein 3 homolog (yeast) (Actr3), mRNA | 0.130 | 1.94E-04 |
| 1418951_at   | taxilin beta                                               | 0.129 | 9.86E-07 |
| 1427211_at   | keratin associated protein 8-1                             | 0.128 | 1.06E-04 |
| 1436867_at   | sarcalumenin                                               | 0.122 | 7.54E-06 |
| 1448745_s_at | loricrin                                                   | 0.110 | 1.13E-04 |
| 1423238_at   | integrin beta 1 binding protein 2                          | 0.109 | 8.05E-06 |
| 1448932_at   | keratin complex 1, acidic, gene 16                         | 0.109 | 4.43E-06 |
| 1435191_at   | corneodesmosin                                             | 0.108 | 5.84E-04 |
| 1460185_at   | keratin complex 2, basic, gene 18                          | 0.104 | 2.37E-06 |
| 1418742_at   | keratin complex 1, acidic, gene 4                          | 0.104 | 9.74E-05 |
| 1428007_at   | keratin associated protein 13-1                            | 0.099 | 2.53E-06 |
| 1422598_at   | calsequestrin 1                                            | 0.098 | 2.19E-04 |
| 1420409_at   | keratin complex 1, acidic, gene 24                         | 0.093 | 2.35E-08 |
| 1420884_at   | sarcolipin                                                 | 0.077 | 3.79E-06 |
| 1448327_at   | actinin alpha 2                                            | 0.070 | 3.40E-05 |
| 1425382_a_at | aquaporin 4                                                | 0.068 | 2.93E-04 |
| 1418677_at   | actinin alpha 3                                            | 0.067 | 1.57E-04 |
| 1427751_a_at | keratin complex 1, acidic, gene 5                          | 0.054 | 4.32E-05 |
| 1447456_x_at | demilune cell and parotid protein ; cDNA sequence BC005655 | 0.050 | 9.98E-06 |
| 1435585_at   | transcription elongation factor A (SII)-like 7             | 0.049 | 4.59E-06 |
| 1451551_at   | keratin complex 2, basic, gene 16                          | 0.049 | 4.73E-05 |
| 1452957_at   | keratin associated protein 3-3                             | 0.041 | 9.06E-06 |

\*List of differentially expressed genes that distinguish between salivary gland tissue from double mutant mice and single mutant  $\beta$ -cat<sup>GOF</sup> mice according to gene chip analysis. Affymetrix probe set ID (Probe ID), gene description, fold change (fc), and p-value (p) are shown. Grey-marked genes were specifically discussed in the text.



Wend *et al.*

**Table S3: Gene set enrichment analysis (GSEA)<sup>1</sup>**

| <b>Double-mutant salivary glands vs. single mutant beta-catenin glands at P1</b>                           |                                    |             |           |            |                    |                                                                        |
|------------------------------------------------------------------------------------------------------------|------------------------------------|-------------|-----------|------------|--------------------|------------------------------------------------------------------------|
| <b>Gene Set name</b>                                                                                       |                                    | <b>Size</b> | <b>ES</b> | <b>NES</b> | <b>FDR (q-val)</b> | <b>Gene Set Description</b>                                            |
| Wnt target gene sets                                                                                       | WNT_TARGETS                        | 17          | -0.79     | -2.19      | 0.0035             | Wnt up-regulated genes in Wnt homepage (Nusse lab)                     |
|                                                                                                            | WNT_Signaling                      | 45          | -0.36     | -1.99      | 0.0524             | Wnt target genes from literature (curated by GEMSEA)                   |
|                                                                                                            | Sansom_APC_LOSS4_UP                | 115         | -0.69     | -2.39      | 0.0013             | Up-regulated in the mouse small intestine 4 d after Apc loss           |
| Cell Cycle-related                                                                                         | CELL_Cycle                         | 67          | -0.61     | -1.77      | 0.0019             | Cell cycle genes (defined by Broad Institute)                          |
|                                                                                                            | BRENTANI_CELL_CYCLE                | 73          | -0.62     | -1.98      | 0.0278             | Cancer-related genes involved in cell cycle                            |
|                                                                                                            | G1_TO_S_CELL_CYCLE_REACTOME        | 59          | -0.49     | -1.82      | 0.0675             | Genes involved in G1 to S progression of cell cycle                    |
| Apoptosis                                                                                                  | REACTOME_APOPTOSIS                 | 102         | 0.59      | 1.62       | 0.0481             | Genes involved in Apoptosis                                            |
| Differentiation                                                                                            | STRUCTURAL_MOLECULE_ACTIVITY       | 243         | 0.36      | 1.89       | 0.0512             | Structural integrity of a complex or assembly within or outside a cell |
| <b>Double-mutant tumor-propagating cells vs. single mutant beta-catenin tumor-propagating cells at P90</b> |                                    |             |           |            |                    |                                                                        |
| <b>Gene Set name</b>                                                                                       |                                    | <b>Size</b> | <b>ES</b> | <b>NES</b> | <b>FDR (q-val)</b> | <b>Gene Set Description</b>                                            |
|                                                                                                            | MULTICELLULAR_ORGANISM_DEVELOPMENT | 78          | -0.45     | -2.03      | 0.0751             | Early organism development                                             |

<sup>1</sup>Table includes gene sets strongly enriched in double-mutant salivary glands at P1 and double-mutant tumor-propagating cells compared to single mutant beta-catenin glands at P90, as determined by gene set enrichment analysis (GSEA). Gene sets were generated and published in the Molecular Signature Database (MsigDB; Broad Institute, <http://www.broad.mit.edu/gsea/msigdb>). Size indicates number of genes included in each gene set. Enrichment score (ES) and normalized enrichment score (NES) and FDR were calculated by GSEA. Negative ES, negative NES, and FDR<0.2 indicate significant enrichment of a specific gene set in double-mutant salivary glands compared to single mutant beta-catenin glands.

Suppl Table 4: Affymetrix gene profiling of CD24<sup>+</sup>CD29<sup>+</sup> salivary gland cells at P80<sup>†</sup>Salivary gland CD24<sup>+</sup>CD29<sup>+</sup> tumor propagating cell-gene signature[1] = Bmpr1a<sup>LOF</sup>[2] =  $\beta$ -cat<sup>GOF</sup>

[3] =double mutant

| Probe ID     | Symbol   | UniGene   | fc [3] / [1] | Regulation [3] / [1] | p [3] / [1] | fc [3] / [2] | Regulation [3] / [2] | p [3] / [2] |
|--------------|----------|-----------|--------------|----------------------|-------------|--------------|----------------------|-------------|
| 1425642_at   | Cep290   | Mm.229114 | 3.891        | up                   | 8.30E-05    | 5.098        | up                   | 6.83E-04    |
| 1420411_a_at | Pi4k2b   | Mm.248647 | 3.571        | up                   | 3.82E-04    | 2.638        | up                   | 1.60E-05    |
| 1420330_at   | Clec4e   | Mm.248327 | 3.369        | up                   | 3.82E-06    | 1.580        | up                   | 1.32E-05    |
| 1437689_x_at | Clu      | Mm.200608 | 2.663        | up                   | 3.27E-04    | 2.354        | up                   | 1.36E-05    |
| 1451798_at   | Il1rn    | Mm.882    | 2.310        | up                   | 3.76E-04    | 1.584        | up                   | 1.73E-06    |
| 1447084_at   | Nfatc1   | Mm.329660 | 2.216        | up                   | 8.39E-04    | 1.026        | up                   | 1.42E-06    |
| 1449254_at   | Spp1     | Mm.288474 | 2.184        | up                   | 2.37E-04    | 1.306        | up                   | 5.46E-05    |
| 1421473_at   | Il1a     | Mm.15534  | 2.155        | up                   | 1.10E-04    | 1.549        | up                   | 2.78E-07    |
| 1447669_s_at | Gng4     | Mm.215394 | 2.066        | up                   | 9.23E-05    | 1.533        | up                   | 1.68E-04    |
| 1449984_at   | Cxcl2    | Mm.4979   | 2.050        | up                   | 3.79E-04    | 1.130        | up                   | 1.34E-04    |
| 1442376_at   | Ablim1   | Mm.217161 | 1.967        | up                   | 2.93E-06    | 2.951        | up                   | 3.42E-07    |
| 1421341_at   | Axin2    | Mm.71710  | 1.930        | up                   | 3.41E-04    | 1.898        | up                   | 8.07E-05    |
| 1436826_at   | Tmtc3    | Mm.296805 | 1.824        | up                   | 4.05E-04    | 2.548        | up                   | 1.35E-05    |
| 1433596_at   | Dnajc6   | Mm.76494  | 1.816        | up                   | 5.75E-04    | 2.491        | up                   | 2.97E-06    |
| 1421492_at   | Ptgs2    | Mm.442454 | 1.663        | up                   | 9.28E-05    | 2.135        | up                   | 8.43E-06    |
| 1433966_x_at | Asns     | Mm.2942   | 1.634        | up                   | 3.88E-08    | 2.939        | up                   | 1.37E-05    |
| 1428748_at   | Zfp826   | Mm.100056 | 1.583        | up                   | 4.01E-04    | 2.229        | up                   | 7.11E-05    |
| 1420549_at   | Gbp1     | Mm.457978 | 1.534        | up                   | 5.81E-05    | 2.697        | up                   | 1.51E-06    |
| 1448595_a_at | Bex1     | Mm.422943 | 1.513        | up                   | 2.37E-06    | 2.557        | up                   | 1.63E-04    |
| 1442282_at   | Vmn2r84  | Mm.359168 | 1.407        | up                   | 1.64E-06    | 2.165        | up                   | 2.75E-04    |
| 1433781_a_at | Cldn12   | Mm.40132  | 1.381        | up                   | 8.04E-05    | 2.766        | up                   | 3.81E-05    |
| 1420410_at   | Nr5a2    | Mm.16794  | 1.373        | up                   | 7.95E-05    | 2.409        | up                   | 3.09E-05    |
| 1425964_x_at | Hspb1    | Mm.13849  | 1.365        | up                   | 1.30E-05    | 2.023        | up                   | 4.61E-04    |
| 1425454_a_at | Il12a    | Mm.103783 | 1.346        | up                   | 7.81E-04    | 2.685        | up                   | 6.30E-07    |
| 1460603_at   | Samd9l   | Mm.196013 | 1.331        | up                   | 1.29E-05    | 2.187        | up                   | 1.12E-04    |
| 1433374_at   | Supt7l   | Mm.164187 | 1.319        | up                   | 1.53E-05    | 2.698        | up                   | 6.33E-05    |
| 1423626_at   | Dst      | Mm.336625 | 1.296        | up                   | 2.29E-04    | 2.292        | up                   | 5.73E-05    |
| 1449211_at   | Bpnt1    | Mm.227549 | 1.294        | up                   | 5.63E-05    | 2.281        | up                   | 4.04E-06    |
| 1430744_at   | Napsa    | Mm.383181 | 1.290        | up                   | 2.75E-04    | 2.072        | up                   | 9.02E-07    |
| 1436865_at   | Sic26a11 | Mm.31869  | 1.239        | up                   | 8.74E-06    | 2.549        | up                   | 3.95E-06    |
| 1457769_at   | H60a     | Mm.387042 | 1.234        | up                   | 1.01E-05    | 2.969        | up                   | 7.54E-06    |
| 1422873_at   | Prq2     | Mm.142727 | 1.198        | up                   | 7.80E-04    | 2.471        | up                   | 1.67E-06    |
| 1455521_at   | Klf12    | Mm.458816 | 1.163        | up                   | 5.93E-07    | 2.049        | up                   | 1.06E-06    |
| 1429366_at   | Lrrc34   | Mm.45373  | 1.159        | up                   | 4.60E-04    | 2.309        | up                   | 1.19E-04    |
| 1455164_at   | Cdgap    | Mm.370848 | 1.158        | up                   | 1.03E-04    | 9.923        | up                   | 9.34E-07    |
| 1435203_at   | Man2a2   | Mm.269245 | 1.142        | up                   | 2.19E-04    | 2.153        | up                   | 5.46E-05    |
| 1425521_at   | Paip1    | Mm.132584 | 1.125        | up                   | 3.54E-05    | 3.036        | up                   | 1.04E-05    |
| 1424748_at   | Galnt11  | Mm.425232 | 1.121        | up                   | 5.39E-05    | 2.129        | up                   | 5.17E-05    |
| 1430139_at   | Hells    | Mm.57223  | 1.103        | up                   | 1.41E-05    | 1.515        | up                   | 6.14E-05    |
| 1459253_at   | Arrdc3   | Mm.423137 | 1.086        | up                   | 8.80E-06    | 3.616        | up                   | 3.11E-05    |
| 1452855_at   | Ly6k     | Mm.273319 | 1.080        | up                   | 2.75E-07    | 2.204        | up                   | 4.84E-05    |
| 1418872_at   | Abcb1b   | Mm.146649 | 1.075        | up                   | 5.07E-04    | 2.655        | up                   | 2.63E-05    |
| 1418148_at   | Abhd1    | Mm.389615 | 1.060        | up                   | 7.17E-05    | 2.775        | up                   | 1.36E-05    |
| 1418645_at   | Hal      | Mm.13000  | 1.060        | up                   | 5.56E-06    | 2.599        | up                   | 8.49E-05    |
| 1438239_at   | Mid1     | Mm.34441  | 1.049        | up                   | 2.41E-04    | 3.717        | up                   | 3.42E-06    |
| 1457936_at   | Mapk8    | Mm.21495  | 1.016        | up                   | 4.56E-05    | 6.864        | up                   | 4.96E-05    |
| 1450897_at   | Arhgap5  | Mm.35059  | 1.015        | up                   | 2.78E-05    | 2.256        | up                   | 2.14E-06    |
| 1426753_at   | Phf17    | Mm.286285 | 1.008        | up                   | 1.68E-04    | 2.227        | up                   | 1.80E-06    |
| 1451704_at   | Abpd     | Mm.389857 | 17.022       | down                 | 2.60E-07    | 1.026        | up                   | 1.35E-05    |
| 1427380_at   | Klk1b3   | Mm.439740 | 12.599       | down                 | 6.00E-07    | 1.002        | up                   | 3.08E-06    |
| 1420770_at   | Klk1b24  | Mm.444308 | 10.713       | down                 | 6.26E-04    | 1.082        | up                   | 9.67E-08    |
| 1421587_at   | Klk1b27  | Mm.445911 | 9.346        | down                 | 7.61E-07    | 1.019        | up                   | 9.93E-05    |
| 1419675_at   | Ngf      | Mm.1259   | 3.273        | down                 | 6.00E-04    | 1.003        | up                   | 7.25E-07    |
| 1433769_at   | Als2cl   | Mm.86338  | 3.143        | down                 | 2.89E-04    | 1.201        | up                   | 6.35E-05    |
| 1451637_a_at | Muc10    | Mm.200411 | 2.670        | down                 | 1.60E-07    | 1.658        | up                   | 9.91E-06    |
| 1448962_at   | Myh11    | Mm.250705 | 2.391        | down                 | 2.05E-04    | 1.134        | up                   | 6.04E-04    |
| 1420700_s_at | Folr4    | Mm.86738  | 2.353        | down                 | 4.08E-04    | 1.097        | up                   | 1.39E-04    |
| 1453568_at   | Dapl1    | Mm.275769 | 2.275        | down                 | 1.51E-05    | 1.351        | up                   | 8.10E-07    |
| 1449191_at   | Wfdc12   | Mm.6433   | 2.190        | down                 | 3.29E-04    | 1.581        | up                   | 4.55E-06    |
| 1426044_a_at | Prkcq    | Mm.329993 | 2.122        | down                 | 2.05E-05    | 1.038        | up                   | 1.17E-05    |
| 1418353_at   | Cd5      | Mm.779    | 2.116        | down                 | 7.78E-05    | 1.197        | up                   | 1.71E-05    |
| 1416454_s_at | Acta2    | Mm.213025 | 2.046        | down                 | 9.14E-06    | 1.047        | up                   | 2.54E-06    |
| 1418612_at   | Sfn1     | Mm.10948  | 2.028        | down                 | 1.92E-04    | 1.202        | up                   | 2.66E-05    |
| 1427532_at   | Trat1    | Mm.167298 | 2.023        | down                 | 2.63E-04    | 1.344        | up                   | 3.91E-06    |
| 1446675_at   | Adk      | Mm.188734 | 1.527        | down                 | 5.26E-05    | 2.049        | up                   | 1.29E-05    |
| 1439843_at   | Camk4    | Mm.22329  | 1.455        | down                 | 3.83E-05    | 2.411        | up                   | 2.24E-04    |
| 1417459_at   | Dcpp1    | Mm.371556 | 1.359        | down                 | 4.85E-04    | 3.931        | up                   | 7.87E-06    |
| 1435462_at   | Plcx2    | Mm.380993 | 1.221        | down                 | 2.98E-06    | 11.585       | up                   | 1.09E-08    |
| 1425764_a_at | Bcat2    | Mm.24210  | 1.202        | down                 | 1.22E-04    | 2.147        | up                   | 5.28E-06    |
| 1431708_a_at | Tia1     | Mm.423551 | 1.149        | down                 | 1.10E-04    | 2.069        | up                   | 3.77E-05    |
| 1452406_x_at | Erdr1    | Mm.391385 | 1.129        | down                 | 3.51E-04    | 2.299        | up                   | 1.83E-05    |



|              |       |          |       |      |          |       |      |          |
|--------------|-------|----------|-------|------|----------|-------|------|----------|
| 1425908_at   | Gnb1  | Mm.2344  | 1.122 | down | 4.27E-06 | 9.115 | down | 5.58E-05 |
| 1423555_a_at | Ifi44 | Mm.30756 | 1.032 | down | 2.29E-06 | 2.300 | down | 5.93E-05 |

\*List of differentially expressed genes that distinguish between CD24<sup>+</sup>CD29<sup>+</sup> salivary gland tumor propagating cells of double mutant mice and CD24<sup>+</sup>CD29<sup>+</sup> salivary gland cells of single mutant mice according to gene chip analysis. Affymetrix probe set ID (Probe ID), gene symbol (Symbol), Unigene ID, gene description, fold change (fc) and p-value (p) are shown. Grey-marked genes were specifically discussed in the text.

**Supplemental Table 5.** Oligo sequences used for quantitative Real-Time PCR.

| <b>Gene</b>       | <b>Primer sequence</b>           |
|-------------------|----------------------------------|
| mc-myc forward    | 5'-TCCTGAAGCAGATCAGCAACAACC-3'   |
| mc-myc reverse    | 5'-TGCTTGAATGGACAGGATGTAGGC-3'   |
| mFas forward      | 5'-AGTGCAAACCAGACTTCTACTGCG-3'   |
| mFas reverse      | 5'-AAGGATGGTCAACAACCATAGGCG-3'   |
| mCK6 forward      | 5'-AGAGAGGGGTTCGCATGAACT-3'      |
| mCK6 reverse      | 5'-TCATCTGTTAGACTGTCTGCCTT-3'    |
| mLoricrin forward | 5'-TTGTGGAAAGACCTCTGGTGGAGG-3'   |
| mLoricrin reverse | 5'-AACCACCTCCATAGGAACCACCG-3';   |
| mAxin2 forward    | 5'-AACTGAAACTGGAGCTGGAAAGCC-3'   |
| mAxin2 reverse    | 5'-TTTGTGGGTCTCTTCATAGCTGC-3'    |
| mLef-1 forward    | 5'-TGATGCCCAATATGAACAGCGACC-3'   |
| mLef-1 reverse    | 5'-TTGCTTGGAGTTGACATCTGACGG-3'   |
| mBmp4 forward     | 5'-AGAAGAATAAGAACTGCCGTCGCC-3'   |
| mBmp4 reverse     | 5'-ATGGCATGGTTGGTTGAGTTGAGG-3'   |
| mMsx2 forward     | 5'-AAATCTGGTTCAGAACCGAAGGG-3'    |
| mMsx2 reverse     | 5'-CATGGTAGATGCCATATCCAACCG-3'   |
| mβ-actin forward  | 5'-TCGTGCGTGACATCAAAGAGAAGC-3'   |
| mβ-actin reverse  | 5'-ATGGATGCCACAGGATTCCATACC-3'   |
| mDppa5 forward    | 5'-GAAATATCTGTTTGGCCACAGGG-3'    |
| mDppa5 reverse    | 5'-GCCATGGACTGAAGCATCCATTTAGC-3' |
| mDkk1 forward     | 5'-TGTTGTGCAAGACACTTCTGGTCC-3'   |
| mDkk1 reverse     | 5'-TGTGGAGCCTAGAAGAATTGCTGG-3'   |
| mNr5a2 forward    | 5'-ACACAGAAGTCGCGTTCAACAACC-3'   |
| mNr5a2 reverse    | 5'-TAGTTGCAAACCGTGTAGTCCAGC-3'   |
| mLrrc34 forward   | 5'-TCAAGGGAATAAACCTGAACCGGC-3'   |
| mLrrc34 reverse   | 5'-ATTGCAGCTGACATCAAGGTAGCG-3'   |
| mDnaj1 forward    | 5'-TACAGCTGGTTGAAGCATTGTGCG-3'   |
| mDnaj1 reverse    | 5'-TCATATGGCCGACGGTATATTGGC-3'   |
| mPdpn forward     | 5'-CACAGAGAACACGAGAGTACAACC-3'   |
| mPdpn reverse     | 5'-ACGCCAACTATGATTCCAACCAGG-3'   |
| mCdgap forward    | 5'-ATTGCCGGATTGGAAGAGAAAGCC-3'   |
| mCdgap reverse    | 5'-ACGGTTGCTAAGTTCCAGTTGTGG-3'   |
| mAbcb1b forward   | 5'-TTATGCTGCTTGTTCGCGTTCGG-3'    |
| mAbcb1b reverse   | 5'-TTTGGCTTTCGCATAGTCAGGAGC-3'   |
| mGeminin forward  | 5'-ATCTCAGACTTCAAGCTGTGGTCC-3'   |
| mGeminin reverse  | 5'-TTTATTCTCCTTTCTCAGGCGGGC-3'   |
| mKlf5 forward     | 5'-ACGTCAATGAAACAGTTCCAGGGC-3'   |
| mKlf5 reverse     | 5'-TTGGGTTGTGAATCGCCAGTTTGG-3'   |
| mFgf5 forward     | 5'-TCCTTGCTCTTCCTCATCTTCTGC-3'   |
| mFgf5 reverse     | 5'-ACTGGAAACTGCTATGTTCCGAGC-3'   |
| mKlk1b3 forward   | 5'-ACCGATTTGTCAGCAAAGCCATCC-3'   |
| mKlk1b3 reverse   | 5'-AATTTGGTGGGTGTAATGCTGCCC-3'   |

|                          |                                   |
|--------------------------|-----------------------------------|
| m <i>Dnajc6</i> forward  | 5'-TCATTTGCCAGCAAACCTACCACC-3'    |
| m <i>Dnajc6</i> reverse  | 5'-AAGCTCACGTTGTAATTGGGTCCG-3'    |
| m <i>Klf3</i> forward    | 5'-GAA GCC CAA CAA ATA TGG GGT-3' |
| m <i>Klf3</i> reverse    | 5'-GGA CGG GAA CTT CAG AGA GG-3'  |
| m <i>Tbx6</i> forward    | 5'-GGCAGCTCCATCTGTACCAT-3'        |
| m <i>Tbx6</i> reverse    | 5'-ACCGAGGCTCAGTACATTGG-3'        |
| m <i>Trim2</i> forward   | 5'-TGGACAGTTCAAAAGTCGTTTCG-3'     |
| m <i>Trim2</i> reverse   | 5'-AATGCTAACCCACTTGTTGTCAT-3'     |
| m <i>Ctnnb1</i> forward  | 5'-TGATTTCGAAACCTTGCCCTTGCC-3'    |
| m <i>Ctnnb1</i> reverse  | 5'-TTACAATCCGGTTGTGAACGTCCC-3'    |
| m <i>Mll1</i> forward    | 5'-AACAAAGCATGGATCTCCCAATGCC-3'   |
| m <i>Mll1</i> reverse    | 5'-ACATGTAGCAACCAATGCCCTTGC-3'    |
| m <i>Cbp</i> forward     | 5'-ACCACAAGTCCATTTGGACAACCC-3'    |
| m <i>Cbp</i> reverse     | 5'-TTCCCACTGATGTTTGCAACTGGG-3'    |
| m <i>Ash1</i> forward    | 5'-AGTTGAAGCTATGCAACGCCAAGC-3'    |
| m <i>Ash1</i> reverse    | 5'-TTCAATTCGGGGCTGACAAACTGG-3'    |
| m <i>Ash2</i> forward    | 5'-AAATGGTGTCAATCAGGGTGTGGC-3'    |
| m <i>Ash2</i> reverse    | 5'-ACATCAGCCAGTGTGTGTTCTACC-3'    |
| m <i>Hells</i> forward   | 5'-TTCGGAATGTAATGGACAGC-3'        |
| m <i>Hells</i> reverse   | 5'-GGGCCACATACAAGAAAAGG-3'        |
| m <i>Amy1</i> forward    | 5'-ACATGTGGCCTGGAGACATAAAGG-3'    |
| m <i>Amy1</i> reverse    | 5'-ATCCCACTTGCGCATAACTTTGCC-3'    |
| h <i>NR5A2</i> forward   | 5'-TCATGGCCTATTTGCAGCAAGAGC-3'    |
| h <i>NR5A2</i> reverse   | 5'-ACCACTTGTCGGTAAATGTGGTCCG-3'   |
| h <i>ABC1B</i> forward   | 5'-AAGGCCTAATGCCGAACACATTGG-3'    |
| h <i>ABC1B</i> reverse   | 5'-TTTGCCATCAAGCAGCACTTTCCC-3'    |
| h <i>LRRC34</i> forward  | 5'-TAATGATATTGGGCCCGAAGGTGG-3'    |
| h <i>LRRC34</i> reverse  | 5'-TTGCATTCCCAGATCACAGTCACC-3'    |
| h <i>HELLS</i> forward   | 5'-AAGGCATGGAATGGCTTAGGATGC-3'    |
| h <i>HELLS</i> reverse   | 5'-CCAGTTAGGAAGTGTAGACAAAGGGC-3'  |
| h <i>DNAJC6</i> forward  | 5'-ATCGAACTGCCAAGTTTCACAGCC-3'    |
| h <i>DNAJC6</i> reverse  | 5'-ACCAACCAGAATTGATGATGCCGC-3'    |
| h <i>MLL1</i> forward    | 5'-AGCAAGGTCATGGCAACAATCAGG-3'    |
| h <i>MLL1</i> reverse    | 5'-AGCTGCATTGGAATCTGAGACGG-3'     |
| h <i>ASH2</i> forward    | 5'-ATGGTTCACGGCTGACACATTGG-3'     |
| h <i>ASH2</i> reverse    | 5'-TTCGGATGTTTCATCCTGTGTTCCGG-3'  |
| h <i>AXIN2</i> forward   | 5'-TTCGGATGTTTCATCCTGTGTTCCGG-3'  |
| h <i>AXIN2</i> reverse   | 5'-TGGTGCAAAGACATAGCCAGAACC-3'    |
| h <i>β-ACTIN</i> forward | 5'-TGGCACACACCTTCTACAATGAGC-3'    |
| h <i>β-ACTIN</i> reverse | 5'-GCACAGCTTCTCCTTAATGTCACGC-3'   |

**Supplemental Table 6.** Oligonucleotide sequences used for transient RNAi.

| Gene                   | Oligo No. | Target Sequence             |
|------------------------|-----------|-----------------------------|
| <i>β-catenin</i>       | 1         | 5'-GCUGAAACAUGCAGUUGUAUU-3' |
|                        | 2         | 5'-GAUAAAGGCUACUGUUGGAUU-3' |
|                        | 3         | 5'-CCACUAAUGUCCAGCGUUUUU-3' |
|                        | 4         | 5'-ACAAGUAGCUGAUAUUGAUUU-3' |
| <i>Mll1</i>            | 1         | 5'-CGCCAAAUGGAGCGAGUUU-3'   |
|                        | 2         | 5'-CCACCAAACCCACGAAGAA-3'   |
|                        | 3         | 5'-AGACAAAGCCCUCGAAGGA-3'   |
|                        | 4         | 5'-GCACAGUGGUCUCACGAUU-3'   |
| <i>Dppa5a</i>          | 1         | 5'-GUUACAUCCUAGCAAGUA-3'    |
|                        | 2         | 5'-AGUCGCUGGUGCUGAAAUA-3'   |
|                        | 3         | 5'-CCACAGGGAUCUCGAAUGU-3'   |
|                        | 4         | 5'-CGAAGAACUUAUCGAGGUC-3'   |
| <i>Crebbp</i><br>(CBP) | 1         | 5'-GGACAGCUGUUUACCAUGA-3'   |
|                        | 2         | 5'-GGAAUGAAGUCAAGGUUUG-3'   |
|                        | 3         | 5'-GAAAGCAGCUGUGUACAAU-3'   |
|                        | 4         | 5'-GCACAAGGAGGUAUUCUUU-3'   |
| <i>Ash1l</i>           | 1         | 5'-GCGAAACAAUGGACAAUUA-3'   |
|                        | 2         | 5'-CAAGUAAGCUCGAGUCUGA-3'   |
|                        | 3         | 5'-GCUUAAGUAUUGAGUGUAA-3'   |
|                        | 4         | 5'-UAGUUGGACUGGUUAAUAA-3'   |
| Control                | 1         | 5'-UGGUUUACAUGUCGACUAA-3'   |
|                        | 2         | 5'-UGGUUUACAUGUUGUGUGA-3'   |
|                        | 3         | 5'-UGGUUUACAUGUUUCUGA-3'    |
|                        | 4         | 5'-UGGUUUACAUGUUUCCUA-3'    |

**Supplemental Table 7.** Oligo sequences used for quantitative Real-Time PCR of ChIP samples.

| Gene               | Primer sequence                  | Amplicon                  |
|--------------------|----------------------------------|---------------------------|
| mMll1 forward_I    | 5'-ACATTCAATGGGAGAGTGCTTGCC-3'   | chr9:44692191+44692323    |
| mMll1 reverse_I    | 5'-AAAGAATCTCTCTCAGTGCCTCCC-3'   |                           |
| mMll1 forward_II   | 5'-AGCGTCGCCCAATTGATTCTATGC-3'   | chr9:44689986+44690098    |
| mMll1 reverse_II   | 5'-AAAGAGCTCCAAGCGTGAAGATGG-3'   |                           |
| mMll1 forward_III  | 5'-ACTGCCCTAGGAGTAACACATCTGC-3'  | chr9:44688508+44688616    |
| mMll1 reverse_III  | 5'-TTCACAGATTACCTCATCCGAGCC-3'   |                           |
| mMll1 forward_IV   | 5'-AGCACCAACTCCATGCAAGTAACC-3'   | chr9:44686793+44686890    |
| mMll1 reverse_IV   | 5'-TAAGCTGACAACACAGATCCCAGG-3'   |                           |
| mHells forward_I   | 5'-AGCACCAGAATCAAAGGTGTGTGC-3'   | chr19:39003188+39003313   |
| mHells reverse_I   | 5'-TGTTGGCCTCCAACCTCAGAAATCC-3'  |                           |
| mHells forward_II  | 5'-ACCTACCGAAAGGACAGGTATTGG-3'   | chr19:39005106+39005195   |
| mHells reverse_II  | 5'-TAATGATGGTCCCAGTTGTTCGG-3'    |                           |
| mHells forward_III | 5'-ACTTGAATCCCGTTCTGAAAGCCC-3'   | chr19:39005840+39005941   |
| mHells reverse_III | 5'-AGCATGGCTGGAGTAATCACCG-3'     |                           |
| mHells forward_IV  | 5'-TGTGTGTGTGAGTGTGAGATGTCC-3'   | chr19:39007011+39007138   |
| mHells reverse_IV  | 5'-TGCAGAGGTACCAGTTTGTTTCC-3'    |                           |
| mAsh2 forward_I    | 5'-ATAGCCATCACTTCATGGCACAGG-3'   | chr8:26952740+26952888    |
| mAsh2 reverse_I    | 5'-ACGCAGAGATTGGTAACTGTGGG-3'    |                           |
| mAsh2 forward_II   | 5'-AAGCATATGGGTGGGCTCTAAACC-3'   | chr8:26951979+26952076    |
| mAsh2 reverse_II   | 5'-TACATGCGCACACATCCGTAAAGC-3'   |                           |
| mAsh2 forward_III  | 5'-AAGCAAGACAAATGTGTTCGCGGC-3'   | chr8:26950689+26950787    |
| mAsh2 reverse_III  | 5'-CTTGCAATGCTTGGTCTGAAAGC-3'    |                           |
| mAsh2 forward_IV   | 5'-AACAGCAGCATGGAAGTGTAAGCC-3'   | chr8:26948631+26948773    |
| mAsh2 reverse_IV   | 5'-ACCATAGCTAATGCAAGACCAGGG-3'   |                           |
| mMyc forward       | 5'-TGCCAGTCAACATAACTGTACGACC-3'  | chr15:61816229+61816317   |
| mMyc reverse       | 5'-AGAGCCACTTAGGGATAAACAGCC-3'   |                           |
| mGapdh forward     | 5'-ACGGCGGTTTCATTCATTTCCTTCC-3'  | chr6:125114819+125114915  |
| mGapdh reverse     | 5'-TGCATACCTTTGCGCATCATCTCC-3'   |                           |
| hMll1 forward_I    | 5'-TCTTCCTTCTTTCTGCTGCCTTGC-3'   | chr11:118304931+118305068 |
| hMll1 reverse_I    | 5'-TGTGTCAACAGATTTCTTCCCGCC-3'   |                           |
| hMll1 forward_II   | 5'-TTCGGGCTAACCCATCTTGTATCC-3'   | chr11:118306634+118306727 |
| hMll1 reverse_II   | 5'-AGAGCAGCTTCCAGTATAACGCGG-3'   |                           |
| hMll1 forward_III  | 5'-ACCTCCTTCCCTCTGAAGATAACGG-3'  | chr11:118309754+118309845 |
| hMll1 reverse_III  | 5'-AGAACTGTAGCCCTGTAAGACGG-3'    |                           |
| hMll1 forward_IV   | 5'-CCATGTAGTTGGAGAACCAAAGGC-3'   | chr11:118309754+118309845 |
| hMll1 reverse_IV   | 5'-CAACTCACATTTAAGCACCACCTCC-3'  |                           |
| hHELLS forward_I   | 5'-TAACTATCCTGTGAGATTGGGCGAGG-3' | chr10:96304154+96304293   |
| hHELLS reverse_I   | 5'-ATTAGCCTGGAATGGGCTAATGTCCG-3' |                           |
| hHELLS forward_II  | 5'-GGCGCCTTGCAAAGTATTAACAGC-3'   | chr10:96305252+96305370   |
| hHELLS reverse_II  | 5'-TAACTATCCTGTGAGATTGGGCGAGG-3' |                           |
| hHELLS forward_III | 5'-GGGAGAAAGGCTGTTTCTTGTTGG-3'   | chr10:96306052+96306164   |



|                    |                                |                          |
|--------------------|--------------------------------|--------------------------|
| hHELLS reverse_III | 5'-AGTTGTTCAACCATTGCTGGAGCC-3' |                          |
| hHELLS forward_IV  | 5'-TTGGGTGCCACAGTTGGTAAATGG-3' | chr10:96307516+96307632  |
| hHELLS reverse_IV  | 5'-ACGGAAGGAGTATTACTGGAGTGG-3' |                          |
| hASH2 forward_I    | 5'-TAGAAGCAAGTCACTGAGTCCAGC-3' | chr8:37960686+37960777   |
| hASH2 reverse_I    | 5'-GATTACAGGAGTGAGCCATCATGC-3' |                          |
| hASH2 forward_II   | 5'-ACCAGCTACTGTTGATGACTTCCC-3' | chr8:37962357+37962438   |
| hASH2 reverse_II   | 5'-ATGTAGACAAGTTTGGTGCCCAGC-3' |                          |
| hASH2 forward_III  | 5'-AAGCTGCAGGAGTATGAAGTTCGG-3' | chr8:37963787+37963923   |
| hASH2 reverse_III  | 5'-ACCGCTTACATCGACCAAGTTTGC-3' |                          |
| hASH2 forward_IV   | 5'-AATGGCAGGATCACAGCTTTCTGC-3' | chr8:37965508+37965626   |
| hASH2 reverse_IV   | 5'-ATAAAGGAAAGCTGGGTGTGGTGG-3' |                          |
| hMYC forward       | 5'-GCGCCATTAATACCCTTCTTTCC-3'  | chr8:128747818+128747989 |
| hMYC reverse       | 5'-ATAAATCATCGCAGGCGGAACAGC-3' |                          |
| hACTIN forward     | 5'-TGCAGAAAGTGCAAAGAACACGGC-3' | chr7:5568420+5568576     |
| hACTIN reverse     | 5'-TGTGGGTGTAGGTACTAACACTGG-3' |                          |
