# Supplementary material
Source: PubMed Central journal article supplement (PMC3715856)

Source Data  
Wend *et al.*, Fig. 5C

(kDa)

15

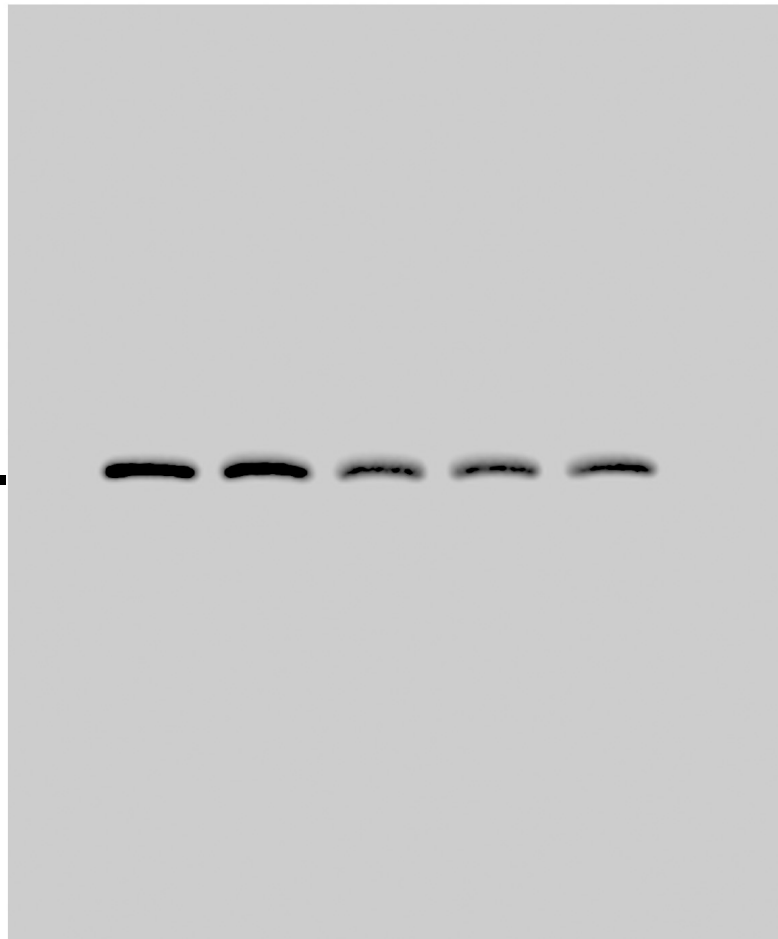

H3K4me3

15

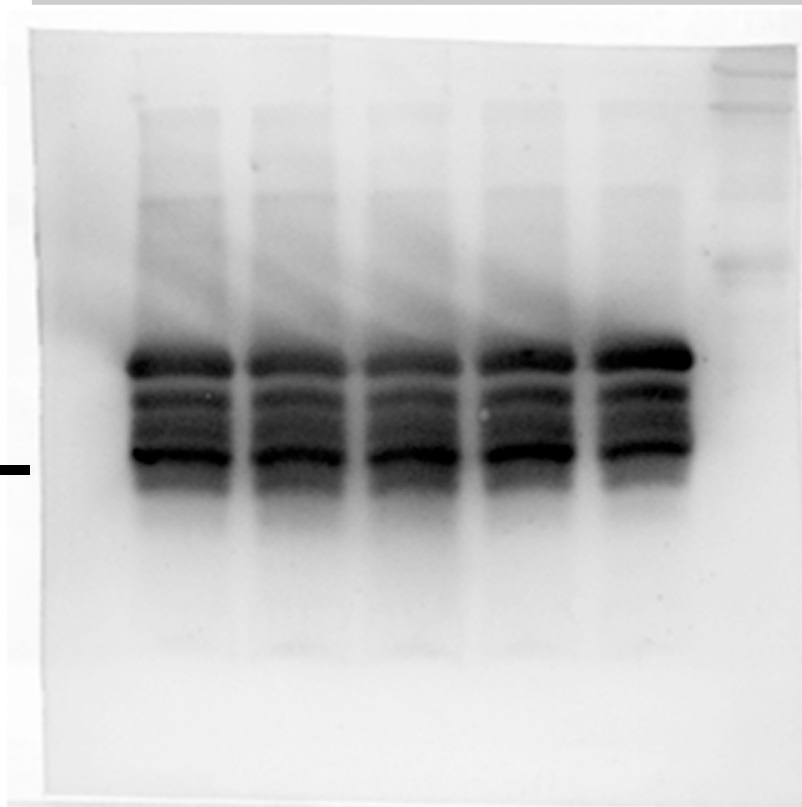

H3

Supplement: emboj2013127df5c.pdf [file emboj2013127df5c.pdf]

Source Data  
Wend *et al.*, Fig. 6

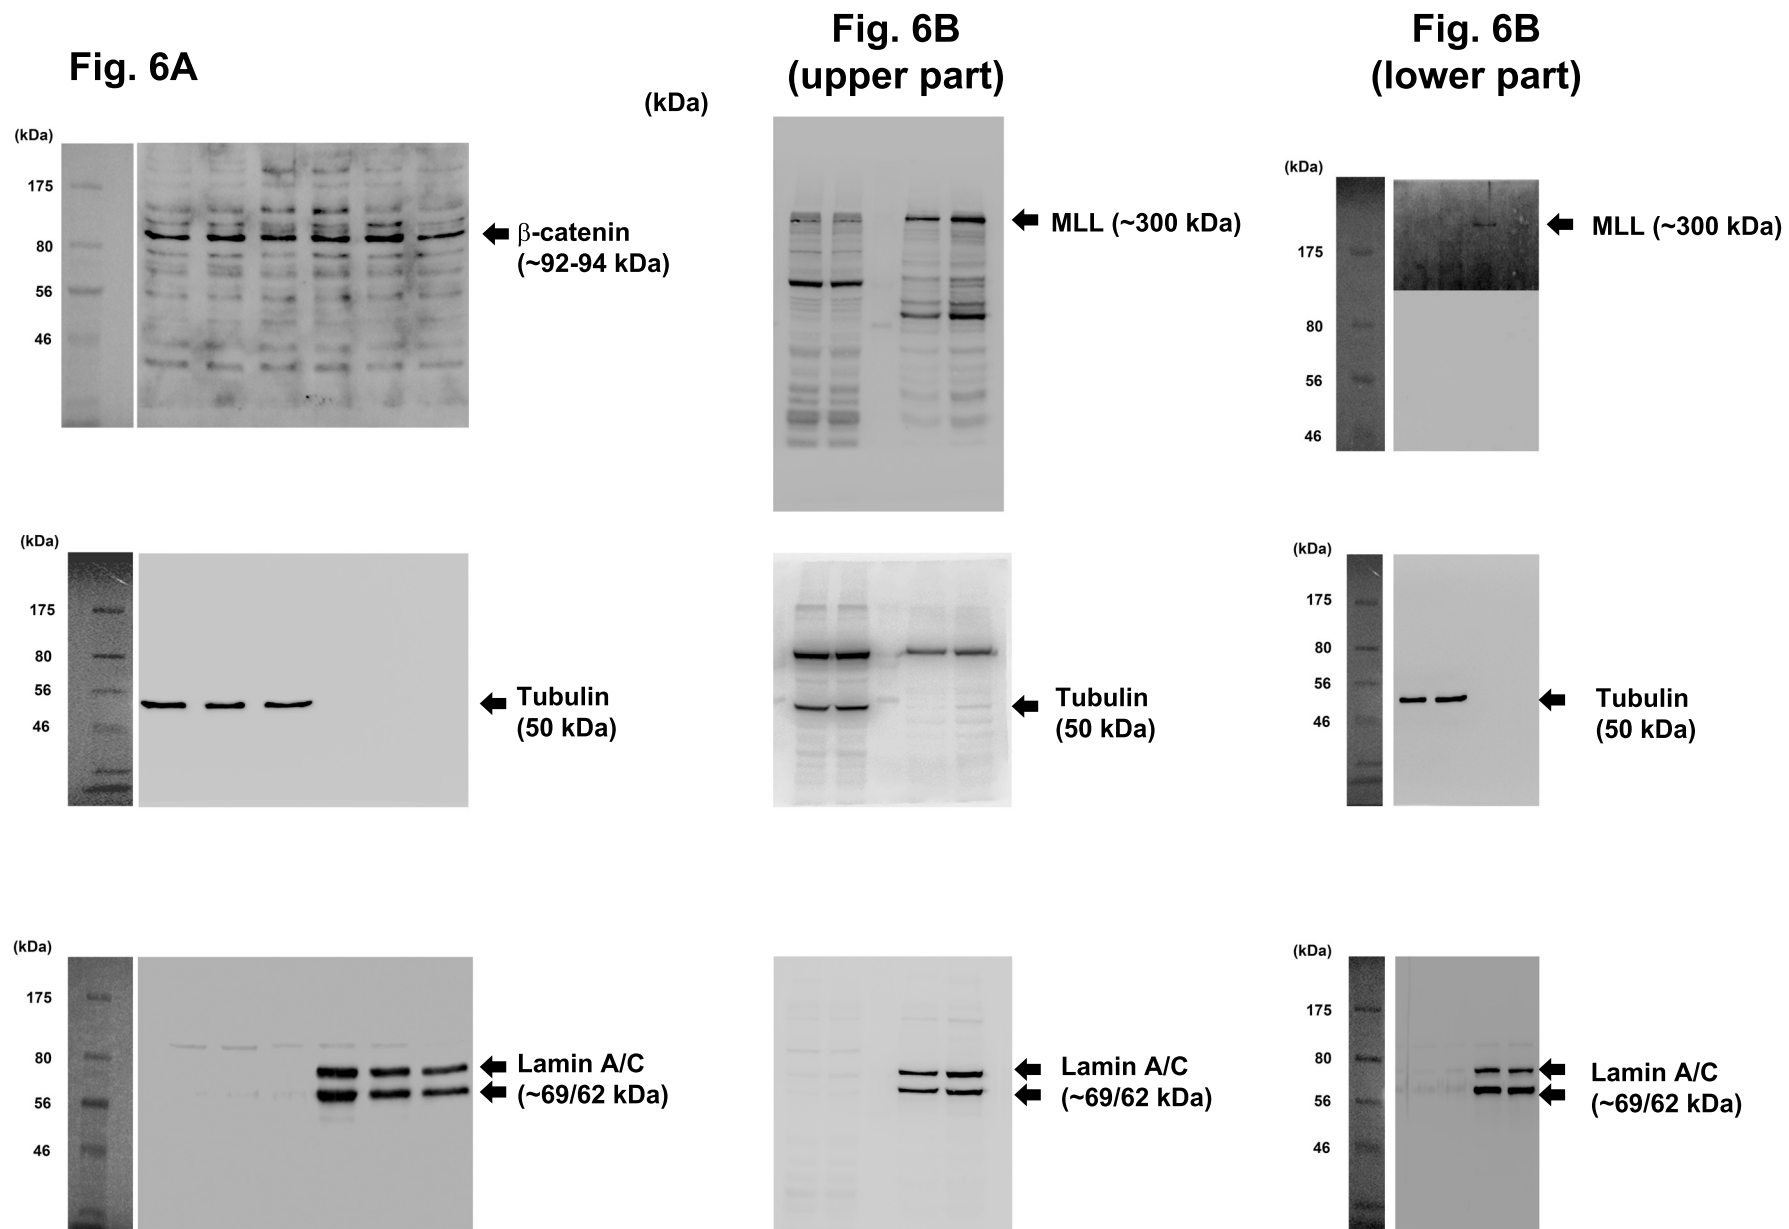

Supplement: emboj2013127df6.pdf [file emboj2013127df6.pdf]

**Source Data**  
**Wend *et al.*, Suppl. Fig. 1G**

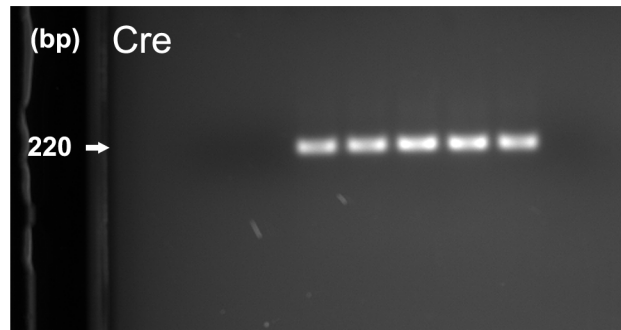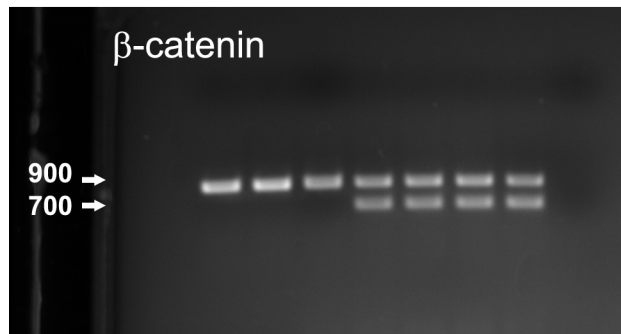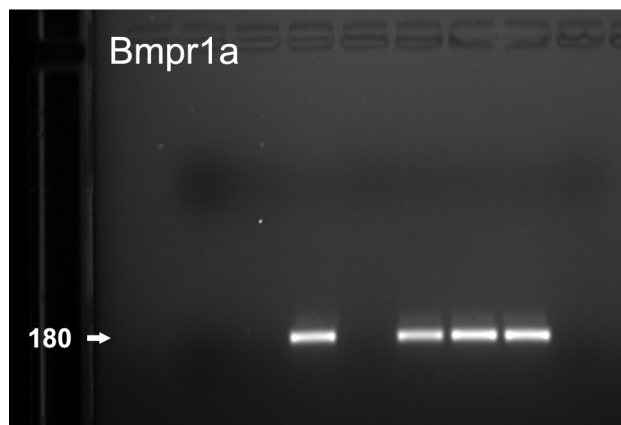

Supplement: emboj2013127dfs1g.pdf [file emboj2013127dfs1g.pdf]

**Source Data**  
**Wend *et al.*, Suppl. Fig. 5F**

(kDa)    H3K4me3 (15-17 kDa)    H3K27me3 (15-17 kDa)

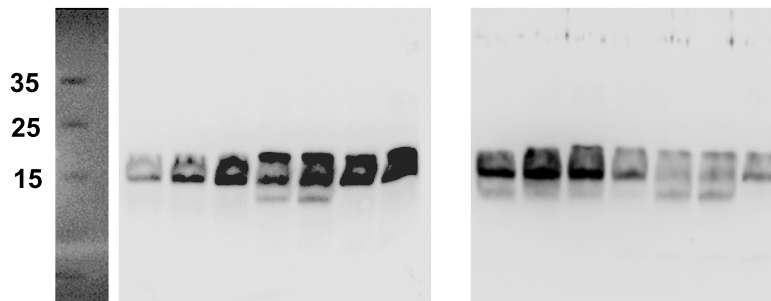

(kDa)    H3K9me3 (15-17 kDa)    H3 (15-18 kDa)

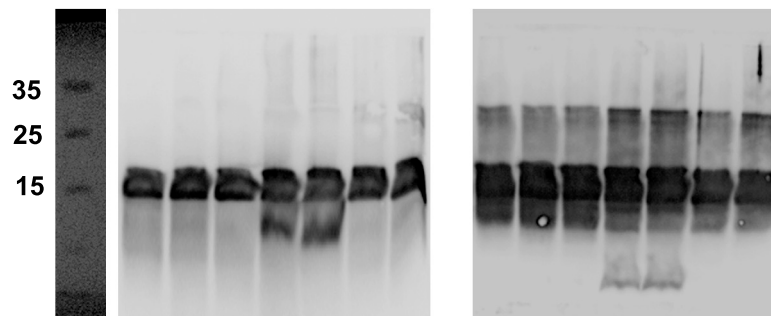

Supplement: emboj2013127dfs5f.pdf [file emboj2013127dfs5f.pdf]

**Source Data**  
**Wend *et al.*, Suppl. Fig. 6A**

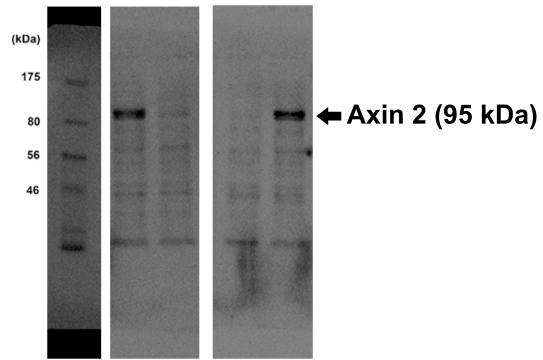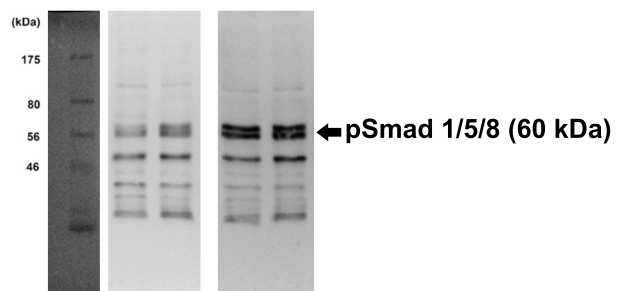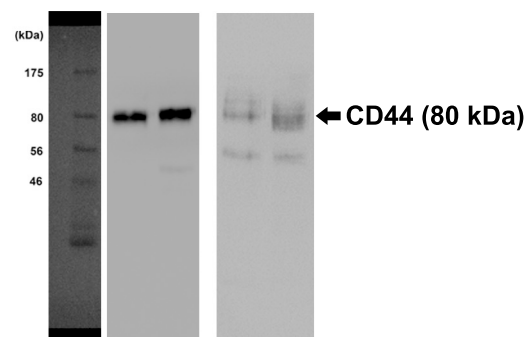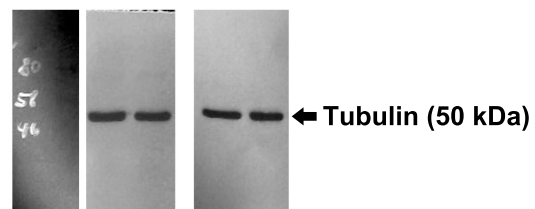

Supplement: emboj2013127dfs6a.pdf [file emboj2013127dfs6a.pdf]

**Source Data**  
**Wend *et al.*, Suppl. Fig. 7A**

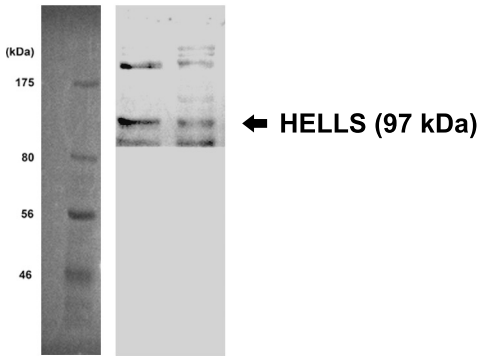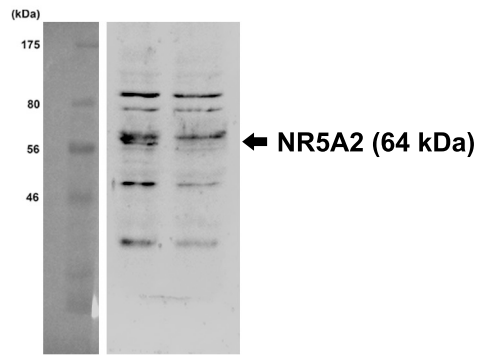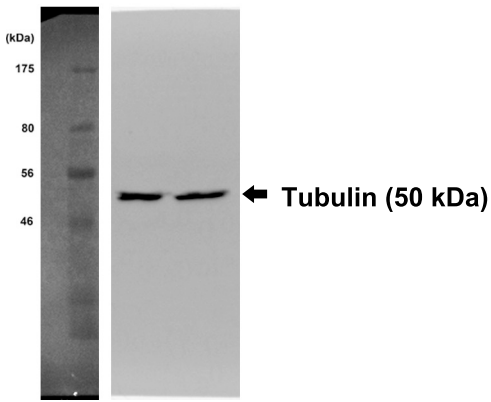

Supplement: emboj2013127dfs7a.pdf [file emboj2013127dfs7a.pdf]
